# **An Iron-Calcium-Miro Axis Influences Parkinson's Risk and Neurodegeneration**

**Vinita Bharat<sup>1</sup>, Roeland Vanhauwaert<sup>1</sup>, Li Li<sup>1</sup>, Colin M. Muir<sup>2,3</sup>, Aarooran Sivakumaran Durairaj<sup>1</sup>, Sujyoti Chandra<sup>1</sup>, Yann Le Guen<sup>4,5</sup>, Pawan Nandakishore<sup>6</sup>, Chung-Han Hsieh<sup>1</sup>, Stefano E. Rensi<sup>7</sup>, Russ B. Altman<sup>7</sup>, Michael D. Greicius<sup>4</sup>, Liang Feng<sup>2</sup>, and Xinnan Wang<sup>1\*</sup>**

## **Affiliations:**

1. Department of Neurosurgery, Stanford University School of Medicine, Stanford, CA94305, USA;

2. Department of Molecular and Cellular Physiology, Stanford University School of Medicine, Stanford, CA94305, USA;

3. Graduate Program of Molecular and Cellular Physiology, Stanford University School of Medicine, Stanford, CA94305, USA;

4. Department of Neurology and Neurological Sciences, Stanford University School of Medicine, Stanford, CA94305, USA;

5. Institut du Cerveau - Paris Brain Institute - ICM, 75013, Paris, France;

6. Vroom Inc., Houston, TX77042, USA;

7. Department of Bioengineering, Stanford University, Stanford, CA94305, USA.

\* Correspondence: [xinnanw@stanford.edu](mailto:xinnanw@stanford.edu)

## 23 **Summary**

24 Genetic backgrounds and risk factors among individuals with Parkinson’s disease (PD) are highly  
25 heterogenous, limiting our ability to effectively detect and treat PD. Here we connect several potential PD  
26 risk genes and elements to one biological pathway. Elevation of  $\text{Fe}^{2+}$ -levels causes  $\text{Ca}^{2+}$ -overflow into the  
27 mitochondria, through an interaction of  $\text{Fe}^{2+}$  with mitochondrial calcium uniporter (MCU), the  $\text{Ca}^{2+}$ -  
28 import channel in the inner mitochondrial membrane, and resultant MCU oligomerization. This  
29 mechanism acts in PD neuron models and postmortem brains. Miro, a  $\text{Ca}^{2+}$ -binding protein, functions  
30 downstream of  $\text{Ca}^{2+}$ -dysregulation, and holds promise to classify PD status and monitor drug efficacy in  
31 human blood cells. Polygenetic enrichment of rare, non-synonymous variants in this iron-calcium-Miro  
32 axis influences PD risk. This axis can be targeted by multiple ways to prevent neurodegeneration in PD  
33 models. Our results show a linear pathway linking several PD risk factors, which can be leveraged for  
34 genetic counseling, risk evaluation, and therapeutic strategies.

35

## 36 **Main Text**

### 37 **Introduction**

38 Parkinson’s disease (PD) is a leading cause of disability, afflicting the aging population. The dopamine  
39 (DA)-producing neurons in the substantia nigra are the first to die in PD patients. A bottleneck that hinders  
40 our ability to effectively detect and treat PD may be the presence of highly heterogenous genetic  
41 backgrounds and risk factors among different patients. More than 90% of the PD cases are considered  
42 sporadic with no known causal mutations. Genome-wide association studies (GWAS) have identified over  
43 90 risk loci (Diaz-Ortiz et al., 2022). Functional studies on known causal genes of familial patients and  
44 from cellular and animal PD models have pointed to multiple “cellular risk elements”, such as  
45 mitochondrial damage, lysosomal dysfunction, immune system activation, neuronal calcium mishandling,

46 and iron accumulation (Angelova et al., 2020; Apicco et al., 2021; Belaidi and Bush, 2016; Buttner et al.,  
47 2013; Kim et al., 2020; Lee et al., 2018; Surmeier et al., 2017; Tabata et al., 2018; Verma et al., 2017;  
48 Vuuren et al., 2020). These distinct genetic and cellular risk factors may confer individual heterogeneity  
49 in disease onset, but also suggest that there are networks and pathways linking these “hubs” in disease  
50 pathogenesis. Identifying their connections could be crucial for finding a cure for PD.

51

52 Mitochondria are the center of cellular metabolism and communication. Ions such as calcium and iron,  
53 are not only essential for diverse mitochondrial functions but can be stored inside the mitochondria to  
54 maintain cellular ionic homeostasis. Ion channels in the plasma and mitochondrial membranes coordinate  
55 for ion uptake, transport, and storage. For example, calcium ions enter the cell via voltage- or ligand-gated  
56 calcium channels across the cell surface. Inside the cell, they are taken up by mitochondria through the  
57 outer mitochondrial membrane (OMM) channel, VDAC, and the inner mitochondrial membrane (IMM)  
58 channel, mitochondrial calcium uniporter (MCU) (Baughman et al., 2011), and extruded into the cytosol  
59 through the IMM transporter, NCLX (Palty et al., 2010). MCU is a multimeric holocomplex consisting of  
60 additional regulatory subunits, such as essential MCU regulator (EMRE), mitochondrial calcium uptake  
61 1 (MICU1), MICU2, and MCUB (Fan et al., 2018; Fan et al., 2020; Lambert et al., 2019). Channels  
62 complementary to these major mitochondrial calcium channels also exist (Patron et al., 2022). It remains  
63 a mystery regarding the relation of calcium and iron ions in PD mechanisms and their contribution to  
64 disease susceptibility.

65

66 Identifying the cellular causes to neuron death will not only provide more effective disease management  
67 but also shed light on molecular signatures shared by a subset of people affected by the disease. A  
68 convenient, cost-effective method to spot the vulnerable population, even before the symptom onset, will

69 be extremely valuable for early intervention and preventive medicine. It will improve the efficacy of  
70 clinical trials for testing experimental drugs, by facilitating patient stratification and serving as a  
71 pharmacodynamic marker.

72

73 Understanding disease-causing cellular paths will also help us zoom in on rare genetic variants that  
74 contribute to disease etiology but otherwise are difficult to discover through GWAS. Integrating studies  
75 of risk variants with disease models and human tissues could establish a causal link of a biological pathway  
76 to a disease with complex traits such as PD, with the promise of identifying more effective druggable  
77 targets and biomarkers. In this work, we harness the power of combining human genetics, cellular and in  
78 vivo models, and patient's tissues, and identify an iron-calcium-Miro axis in PD. Iron accumulation causes  
79 mitochondrial calcium overload via promoting MCU oligomerization and its channel activity, which may  
80 consequently disturb cellular calcium homeostasis. Miro, a calcium-binding protein, acts downstream of  
81 calcium dysregulation in PD models. Functional and genetic impairments in this axis may increase PD  
82 risk and indicate PD status.

83

## 84 **Results**

### 85 **A high-content Miro1 screening assay identifies a network of Ca<sup>2+</sup>-related drug hits for PD**

86 Miro is an OMM protein essential for mediating mitochondrial motility and safeguarding their quality.  
87 Human Miro1 and Miro2 are paralogs with high sequence similarity. We have previously shown that in  
88 fibroblasts or neurons derived from sporadic and familial PD patients, Miro1 degradation upon  
89 mitochondrial depolarization is delayed, consequently slowing mitophagy and increasing neuronal  
90 sensitivity to stressors (Hsieh et al., 2019; Hsieh et al., 2016; Shaltouki et al., 2018). This Miro1 phenotype  
91 would serve as an excellent readout for screening small molecules that promote Miro1 degradation

92 following depolarization. Many compounds in the commonly used screening libraries have well-defined  
93 roles and targets, and some show efficacy to treat certain human diseases. This rich information may allow  
94 us to reveal cellular pathways underlying the Miro1 phenotype in PD. To this end, we established a  
95 sensitive immunocytochemistry (ICC)-based assay that was suitable for high-throughput screening  
96 (Figures 1A, S1, S2, S3A, more details in Method). We performed the primary screens at the Stanford  
97 High-Throughput Bioscience Center (HTBC) using 3 drug libraries in a sporadic PD fibroblast line.  
98 Overall, we identified 35 actives (1.92% primary hit rate) that reduced Miro1 following mitochondrial  
99 depolarization (Figure S1, Table S1A-B). To validate the results of the high-content assays, we retested  
100 34 out of the 35 positive Miro1 reducers identified at the Stanford HTBC in our own laboratory using  
101 fresh compounds and our confocal microscope. We confirmed that 15 compounds reliably reduced Miro1  
102 protein levels following mitochondrial depolarization in PD fibroblasts (Figure S2, Table S1C). Next, we  
103 performed a pathway analysis using a knowledge graph-based tool to reveal the potential cellular pathways  
104 connecting Miro1 to each hit compound. Strikingly, we discovered intracellular  $\text{Ca}^{2+}$  as a primary shared  
105 factor in the hit drug-Miro1 network (Figure 1B, Table S2). Two drugs, Benidipine and Tranilast, could  
106 directly inhibit plasma membrane  $\text{Ca}^{2+}$ -channels. Benidipine is a blocker of voltage-gated  $\text{Ca}^{2+}$ -channels  
107 (L-, N-, T-type), and Tranilast has been proposed to inhibit ligand-gated  $\text{Ca}^{2+}$ -channels (TRPV2)  
108 (Darakhshan and Pour, 2015). Dysregulation of  $\text{Ca}^{2+}$  homeostasis has been widely reported in PD models  
109 (Angelova et al., 2020; Apicco et al., 2021; Buttner et al., 2013; Kim et al., 2020; Lee et al., 2018; Surmeier  
110 et al., 2017; Tabata et al., 2018; Verma et al., 2017). Our results suggest a direct link of the  $\text{Ca}^{2+}$ -binding  
111 protein, Miro, to  $\text{Ca}^{2+}$ -mediated abnormality in PD.

112

### 113 **Validation of a role for Benidipine in Miro degradation**



114 To understand in detail the relation of Miro with the Ca<sup>2+</sup>-pathway in Parkinson's pathogenesis, we further  
115 examined Benidipine's role in Miro protein stability. Using the same ICC method as in Figure S2, we  
116 found that Benidipine reduced Miro1 in a dose-dependent manner in PD fibroblasts treated with carbonyl  
117 cyanide 4-(trifluoromethoxy)phenylhydrazone (FCCP) (Figure S3B). To exclude the possibility of any  
118 artifacts caused by our ICC method, we verified our results using an entirely different approach to detect  
119 Miro1 response to depolarization. We measured Miro1 and additional mitochondrial proteins by Western  
120 blotting. We also depolarized mitochondria with a different uncoupler, carbonyl cyanide *m*-chlorophenyl  
121 hydrazone (CCCP) (Hsieh et al., 2019), instead of FCCP. We detected Miro1 and mitochondrial markers  
122 at 6 and 14 hours after CCCP treatment. We have previously demonstrated that in healthy control  
123 fibroblasts following CCCP treatment, Miro1 is degraded earlier (6 hours) than multiple other  
124 mitochondrial markers (14 hours) (Figure S3C) (Hsieh et al., 2019; Hsieh et al., 2016), consistent with the  
125 observation of proteasomal degradation of Miro1 prior to mitophagy (Chan et al., 2011; Hsieh et al., 2019;  
126 Hsieh et al., 2016; Wang et al., 2011). Using this alternative method, we confirmed that both Miro1  
127 degradation and damaged mitochondrial clearance were impaired in the PD cell line we used for screens.  
128 Importantly, Benidipine promoted Miro1 degradation after 6 hours following CCCP treatment without  
129 affecting the matrix protein ATP5 $\beta$  and facilitated mitochondrial clearance as was evidenced by the  
130 degradation of both Miro1 and ATP5 $\beta$  at 14 hours post-treatment (Figure S3C). Interestingly, Miro2 was  
131 also resistant to depolarization-induced degradation in PD cells (Hsieh et al., 2019) and Benidipine  
132 rescued its phenotype (Figure S3C). This result suggests that Miro1 and Miro2, which share the Ca<sup>2+</sup>-  
133 binding EF-hands, are functionally redundant in the Ca<sup>2+</sup>-dependent regulation. We confirmed that  
134 Benidipine did not affect *Miro1* messenger RNA (mRNA) expression detected by reverse transcription  
135 quantitative real-time PCR (RT-qPCR) under basal and depolarized conditions in PD cells (Figure S3D).  
136 Neither did Benidipine alter the basal ATP levels (Figure S3E), nor the mitochondrial membrane potential

137 measured by TMRM staining (Figure S3F). Collectively, we have demonstrated that Benidipine, a  $\text{Ca}^{2+}$ -  
138 channel blocker, specifically promotes Miro degradation upon depolarization in PD fibroblasts using  
139 multiple methods.

140

### 141 **Benidipine rescues Parkinson's phenotypes in human neuron and fly models of PD**

142 We have previously shown that reducing Miro rescues Parkinson's phenotypes in cellular and in vivo  
143 models (Hsieh et al., 2019; Hsieh et al., 2016; Li et al., 2021; Shaltouki et al., 2018), suggesting that small  
144 molecules that lower Miro protein levels could represent an effective therapeutic approach for PD. From  
145 our high-throughput screens we have discovered that Benidipine, which targets the  $\text{Ca}^{2+}$  pathway,  
146 promotes Miro degradation upon depolarization in skin cells of a PD patient (Figures 1, S1-3). We next  
147 tested whether Benidipine was useful for alleviating Parkinson's phenotypes in two independent models:  
148 the human neuron and fly models. We examined Benidipine using induced pluripotent stem cells (iPSCs)  
149 from one familial patient with the A53T mutation in *SNCA* (encodes  $\alpha$ -synuclein) and its isogenic wild-  
150 type control (Hsieh et al., 2019; Hsieh et al., 2016; Li et al., 2021; Shaltouki et al., 2018). We differentiated  
151 iPSCs to neurons expressing tyrosine hydroxylase (TH), the rate-limiting enzyme for DA synthesis as  
152 previously described (Figure S4A) (Hsieh et al., 2019; Hsieh et al., 2016; Li et al., 2021; Shaltouki et al.,  
153 2018). These patient-derived neurons display increased expression of endogenous  $\alpha$ -synuclein (Shaltouki  
154 et al., 2018). We identified DA neurons by TH-immunostaining and cell death by terminal  
155 deoxynucleotidyl transferase dUTP nick end labeling (TUNEL)-staining (Li et al., 2021; Shaltouki et al.,  
156 2018) (Figures 2A-B, S4A). We have previously shown that iPSC-derived DA neurons from PD patients  
157 are more vulnerable to stressors than those from healthy controls (Hsieh et al., 2019; Hsieh et al., 2016;  
158 Li et al., 2021; Shaltouki et al., 2018). The treatment of the complex III inhibitor, Antimycin A, at 10  $\mu\text{M}$   
159 for 6 hours caused acute neuronal cell death leading to the loss of TH and the increase of TUNEL signals



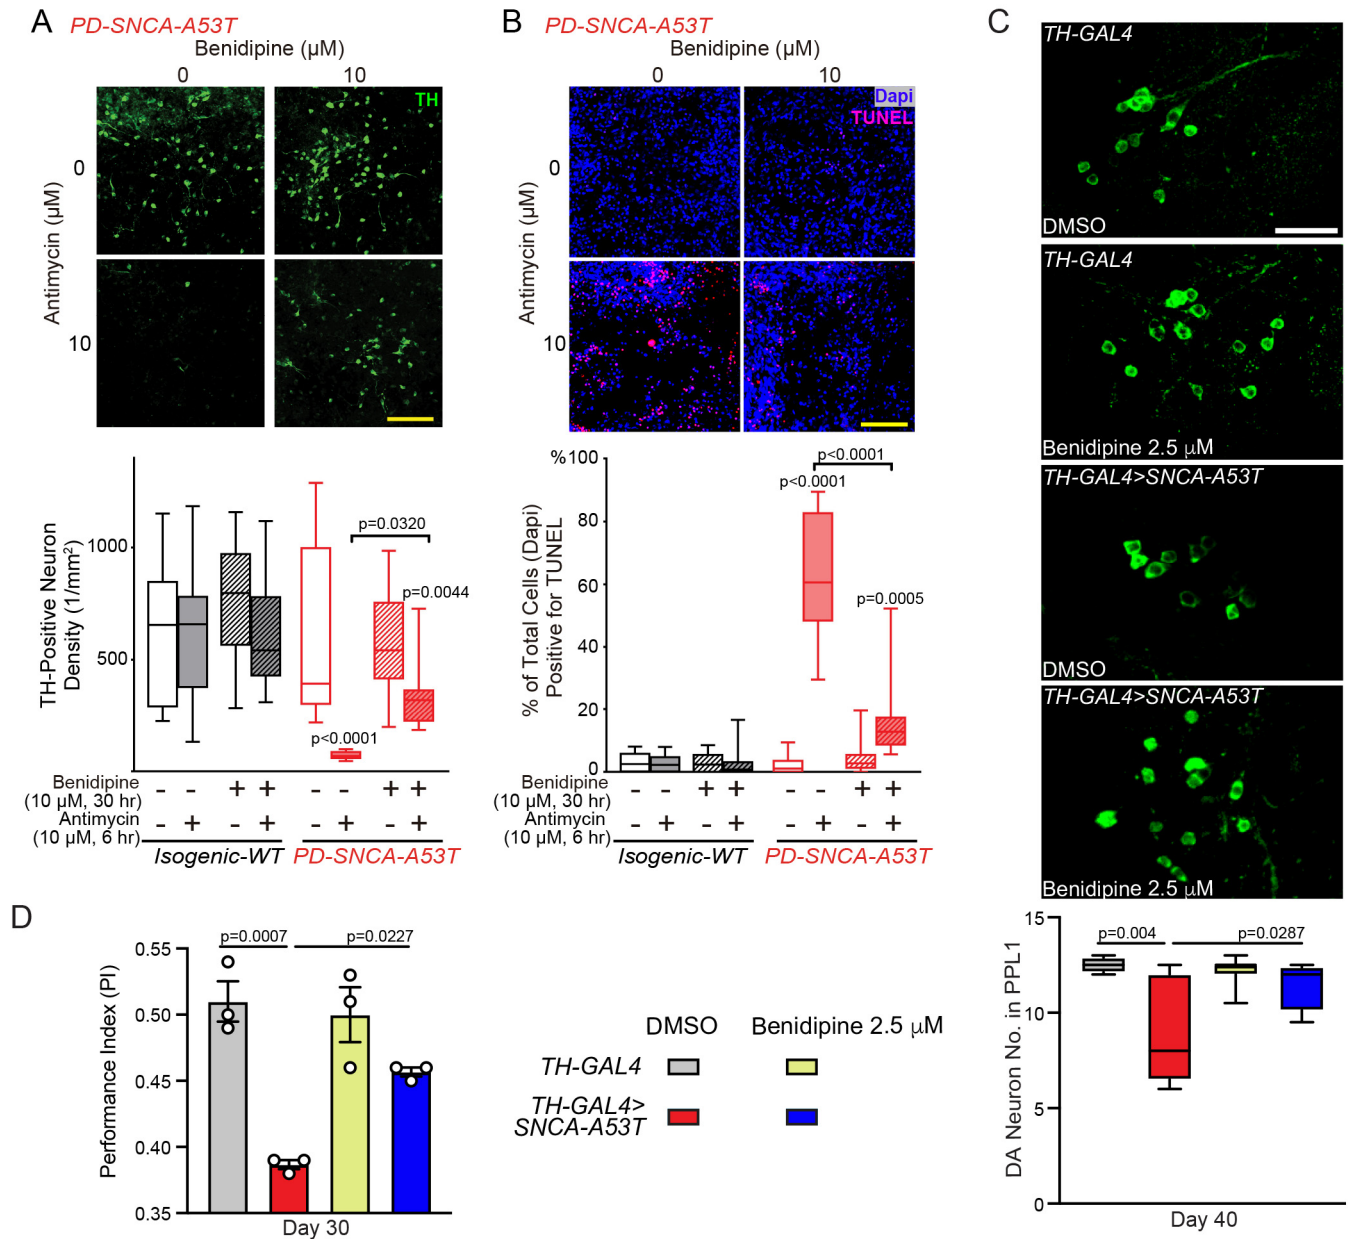

Figure 2. Benidipine Rescues PD Relevant Phenotypes. (A-B) iPSC-derived neurons from a PD patient with SNCA-A53T and the isogenic control, treated as indicated, were immunostained with anti-TH (A) or TUNEL and Dapi (B), and imaged under a confocal microscope. Scale bars: 100  $\mu\text{m}$ . Below: Quantifications of the density of TH-positive neurons (A) or the percentage of TUNEL-positive neurons (B).  $n=20$  images from 3 independent coverslips. P values are compared with the far-left bar, except indicated otherwise. (C) 40-day-old fly brains were immunostained with anti-TH and the DA neuron number was counted in the PPL1 cluster. Scale bar: 20  $\mu\text{m}$ .  $n=4, 7, 7, 4$  (from left to right). (D) The Performance Index was measured in 30-day-old flies, fed as indicated.  $n=59, 57, 54, 57$  flies (from left to right), 3 independent experiments. (C-D) Drug treatment was started from adulthood (day 1). One-Way Anova Post Hoc Tukey Test for all panels.

160 in neurons derived from the PD patient (Hsieh et al., 2019; Li et al., 2021; Shaltouki et al., 2018) (Figure  
161 2A-B). Notably, Benidipine treatment at 10  $\mu$ M for 30 hours significantly rescued this stressor-induced  
162 neuron death (Figure 2A-B).

163 In order to cross-validate the neuroprotective effect of Benidipine in vivo, we fed Benidipine to a fly  
164 model of PD, which expressed the pathogenic human  $\alpha$ -synuclein protein with the A53T mutation ( $\alpha$ -  
165 syn-A53T) in DA neurons driven by *TH-GAL4* (Hsieh et al., 2019; Li et al., 2021; Shaltouki et al., 2018).  
166 These flies exhibit PD-relevant phenotypes such as age-dependent locomotor decline and DA neuron loss  
167 (Hsieh et al., 2019; Li et al., 2021; Shaltouki et al., 2018). Importantly, feeding PD flies with 2.5  $\mu$ M  
168 Benidipine from adulthood prevented DA neuron loss in aged flies (Figure 2C) and improved their  
169 locomotor ability (Figure 2D). Taken together, Benidipine, which eliminates the Miro1 defect in PD  
170 fibroblasts, rescues PD-related phenotypes in human neuron and fly models.

171

### 172 **The EF-hands of Miro play a role in causing Parkinson's-relevant phenotypes**

173 Having demonstrated a link between Miro and  $Ca^{2+}$  in multiple models of PD, we next determined whether  
174  $Ca^{2+}$  directly interacted with Miro to contribute to phenotypes in these models. To achieve this goal, we  
175 made GFP-tagged human Miro1 protein in both the wild-type (Miro1-WT) form and in a mutant form  
176 where two point mutations were introduced in the two EF-hands of Miro1 (Miro1-KK) to block  $Ca^{2+}$ -  
177 binding (Wang and Schwarz, 2009). We expressed GFP-tagged Miro1 (WT or KK) and Mito-dsRed that  
178 labeled mitochondria in iPSC-derived neurons from the PD patient and isogenic control, described earlier.  
179 We chose the distal segment of the axon for analysis (Hsieh et al., 2016). We have previously shown that  
180 following 100  $\mu$ M Antimycin A treatment that triggers mitophagy, Miro1 and mitochondria are  
181 sequentially degraded in wild-type neurons (Hsieh et al., 2019; Hsieh et al., 2016; Shaltouki et al., 2018).  
182 We observed the same mitochondrial events in isogenic control axons transfected with GFP-Miro1-WT.

183 Within 25 min GFP-Miro1-WT was partially degraded, and within 58 min mitochondrial clearance was  
184 induced (Figure 3A-C). In contrast, in PD neuron axons transfected with GFP-Miro1-WT, the degradation  
185 rates of both Miro1 and damaged mitochondria upon Antimycin A treatment were slowed (Figure 3A-C),  
186 consistent with our previous studies (Hsieh et al., 2019; Shaltouki et al., 2018). Notably, GFP-Miro1-KK  
187 significantly rescued these phenotypes in PD axons: it expedited the degradation rates to the control level  
188 (Figure 3A-C). These data suggest that Miro1 directly binds to  $\text{Ca}^{2+}$  to mediate mitochondrial phenotypes  
189 in PD neurons, at least in part.

190 To confirm the Miro- $\text{Ca}^{2+}$  relation in vivo, we generated transgenic flies carrying T7-tagged fly Miro  
191 (DMiro)-WT or DMiro-KK. DMiro is an ortholog of human Miro1 and Miro2. Both DMiro-WT and  
192 DMiro-KK were expressed at comparable levels when the transgenes were driven by the ubiquitous driver  
193 *Actin-GAL4* (Figure S4B). We next crossed these transgenic flies to a fly PD model described earlier that  
194 expressed human  $\alpha$ -syn-A53T in DA neurons driven by *TH-GAL4*. Consistent with the results from  
195 human neurons, DMiro-KK significantly rescued the PD-relevant phenotypes including the age-  
196 dependent DA neuron loss and locomotor decline, as compared to DMiro-WT (Figure 3D-E). Altogether,  
197 we have provided evidence showing that the  $\text{Ca}^{2+}$ -binding domain of Miro plays a key role in causing  
198 phenotypes in human neuron and fly models of PD.

### 199 200 **The $\text{Ca}^{2+}$ -uptake ability of mitochondria is enhanced in PD neurons**

201 Our results, showing that either blocking  $\text{Ca}^{2+}$ -entry into the cell or inhibiting  $\text{Ca}^{2+}$ -binding to Miro rescues  
202 the Miro and neurodegenerative phenotypes in PD models (Figures 1-3), placed  $\text{Ca}^{2+}$  dysregulation  
203 upstream of Miro. We next dissected how  $\text{Ca}^{2+}$ -handling was mis-regulated in neurons derived from the  
204 PD patient (Figures 2-3). We stimulated these neurons with the G-protein-coupled receptor (GPCR)  
205 agonist, thrombin, and measured cytosolic and mitochondrial  $\text{Ca}^{2+}$  levels with live Calcium Green and

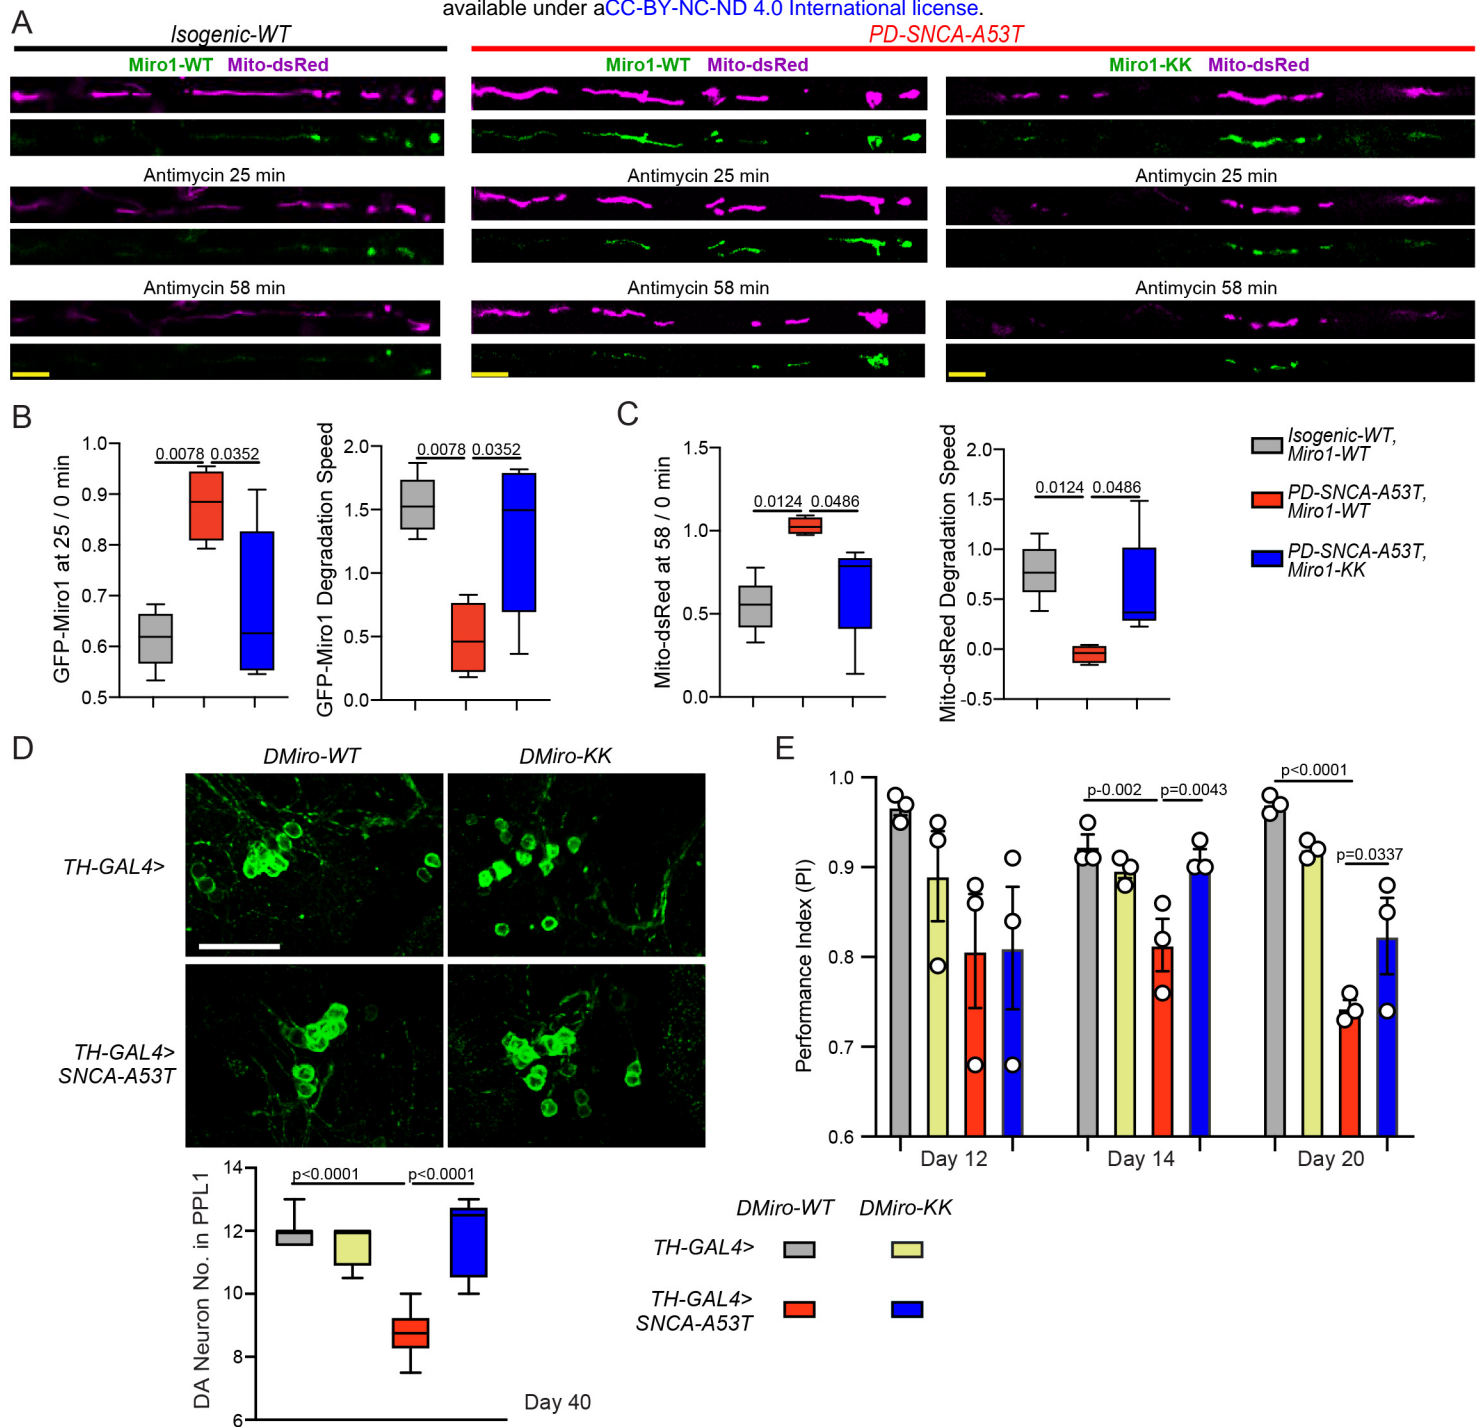

**Figure 3. The EF-hands of Miro Play a Role in Causing PD Relevant Phenotypes.** (A) Representative still images from live Mito-dsRed and GFP-Miro1 imaging movies of axons of indicated genotypes, following 100 uM Antimycin A treatment. Scale bar: 10 um. (B) Left: Quantification of the GFP-Miro1 intensity at 25 minutes divided by that at 0 minute following 100 uM Antimycin A treatment from the same axonal region. Right: Quantification of the reduction speed of the GFP-Miro1 intensity within 25 minutes following 100 uM Antimycin A treatment. (C) Left: Quantification of the Mito-dsRed intensity at 58 minutes divided by that at 0 minute following 100 uM Antimycin A treatment from the same axonal region. Right: Quantification of the Mito-dsRed intensity reduction speed within 58 minutes following 100 uM Antimycin A treatment. (B-C) n=5, 4, 5 (from left to right) axons (one axon per coverslip). (D) The DA neuron number was counted in the PPL1 cluster of flies with indicated genotypes. Scale bar: 20 um. n=7, 4, 6, 5 (from left to right). (E) The Performance Index was measured in flies with indicated genotypes and age. n (from left to right)=49, 47, 40, 47 flies (day 12); 49, 47, 39, 47 (day 14); 48, 45, 37, 44 (day 20); 3 independent experiments. One-Way Anova Post Hoc Tukey Test for all panels.

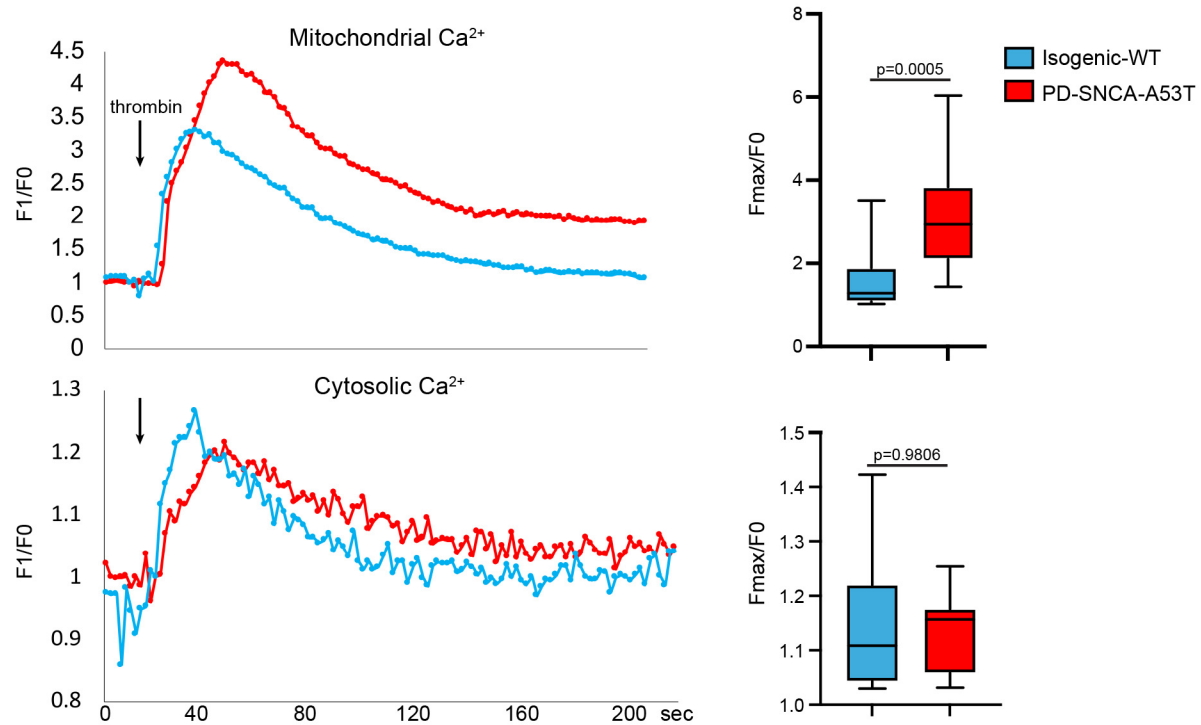

Figure 4. PD Mitochondria Import More Ca<sup>2+</sup>. iPSC-derived neurons from a PD patient with SNCA-A53T and the isogenic control were stimulated with thrombin and mitochondrial (Rhod-2) and cytosolic Ca<sup>2+</sup> levels (Calcium Green) were measured. Left: Representative traces of Ca<sup>2+</sup> ions in neurons. Right: Quantifications of the peak fluorescent intensity normalized to baseline. n=15 cell bodies from 3 independent coverslips. Two-tailed Welch's T Test.

206 Rhod-2 staining, respectively. We found that thrombin triggered intracellular  $\text{Ca}^{2+}$  mobilization and  
207 elevation, which was comparable between PD and isogenic control neurons (Figure 4). However,  
208 mitochondria in PD neurons sustained significantly larger  $\text{Ca}^{2+}$ -elevation after thrombin stimulation, as  
209 compared to control (Figure 4). These results indicate that the mitochondrial  $\text{Ca}^{2+}$ -import ability is boosted  
210 in PD neurons.

211

### 212 **Iron promotes the assembly of MCU oligomers**

213 The enhanced mitochondrial  $\text{Ca}^{2+}$ -uptake observed in PD neurons (Figure 4) led us to investigate the  $\text{Ca}^{2+}$ -  
214 uptake channel in the IMM-MCU. The oligomerization of MCU is essential for MCU's function to import  
215  $\text{Ca}^{2+}$  into the mitochondria (Dong et al., 2017; Fan et al., 2018; Fan et al., 2020). We hypothesized that  
216 MCU oligomerization could be affected by small molecules in the mitochondrial microenvironment,  
217 particularly those with a role in PD, including  $\text{Ca}^{2+}$  (Figure 4), reactive oxygen species (ROS), and iron  
218 (Belaidi and Bush, 2016). To explore this possibility, we performed size exclusion chromatography (SEC),  
219 where protein complexes with higher molecular weight (MW) are eluted faster than those with lower MW,  
220 using lysates of HEK cells treated with  $\text{Fe}^{2+}$ ,  $\text{Ca}^{2+}$ , or  $\text{H}_2\text{O}_2$ . Detecting MCU from cell lysates using SEC  
221 has been successfully shown (Dong et al., 2017; Lambert et al., 2019; Tomar et al., 2016). We found that  
222  $\text{Fe}^{2+}$ ,  $\text{Ca}^{2+}$ , and  $\text{H}_2\text{O}_2$  treatment all shifted the MCU elution peaks to the earlier fractions of higher-order  
223 oligomers compared to control (Figure 5A, S4C-G; anti-MCU was validated in Figure S4C). In contrast,  
224 the elution pattern of Miro1 was largely unaltered by any of these treatments (Figure S4D-G). These  
225 results show that intracellular small molecules including iron,  $\text{Ca}^{2+}$  (Fan et al., 2020), and  $\text{H}_2\text{O}_2$  (Dong et  
226 al., 2017) can influence the equilibrium of MCU oligomeric complexes and may consequently alter the  
227 MCU channel activity.



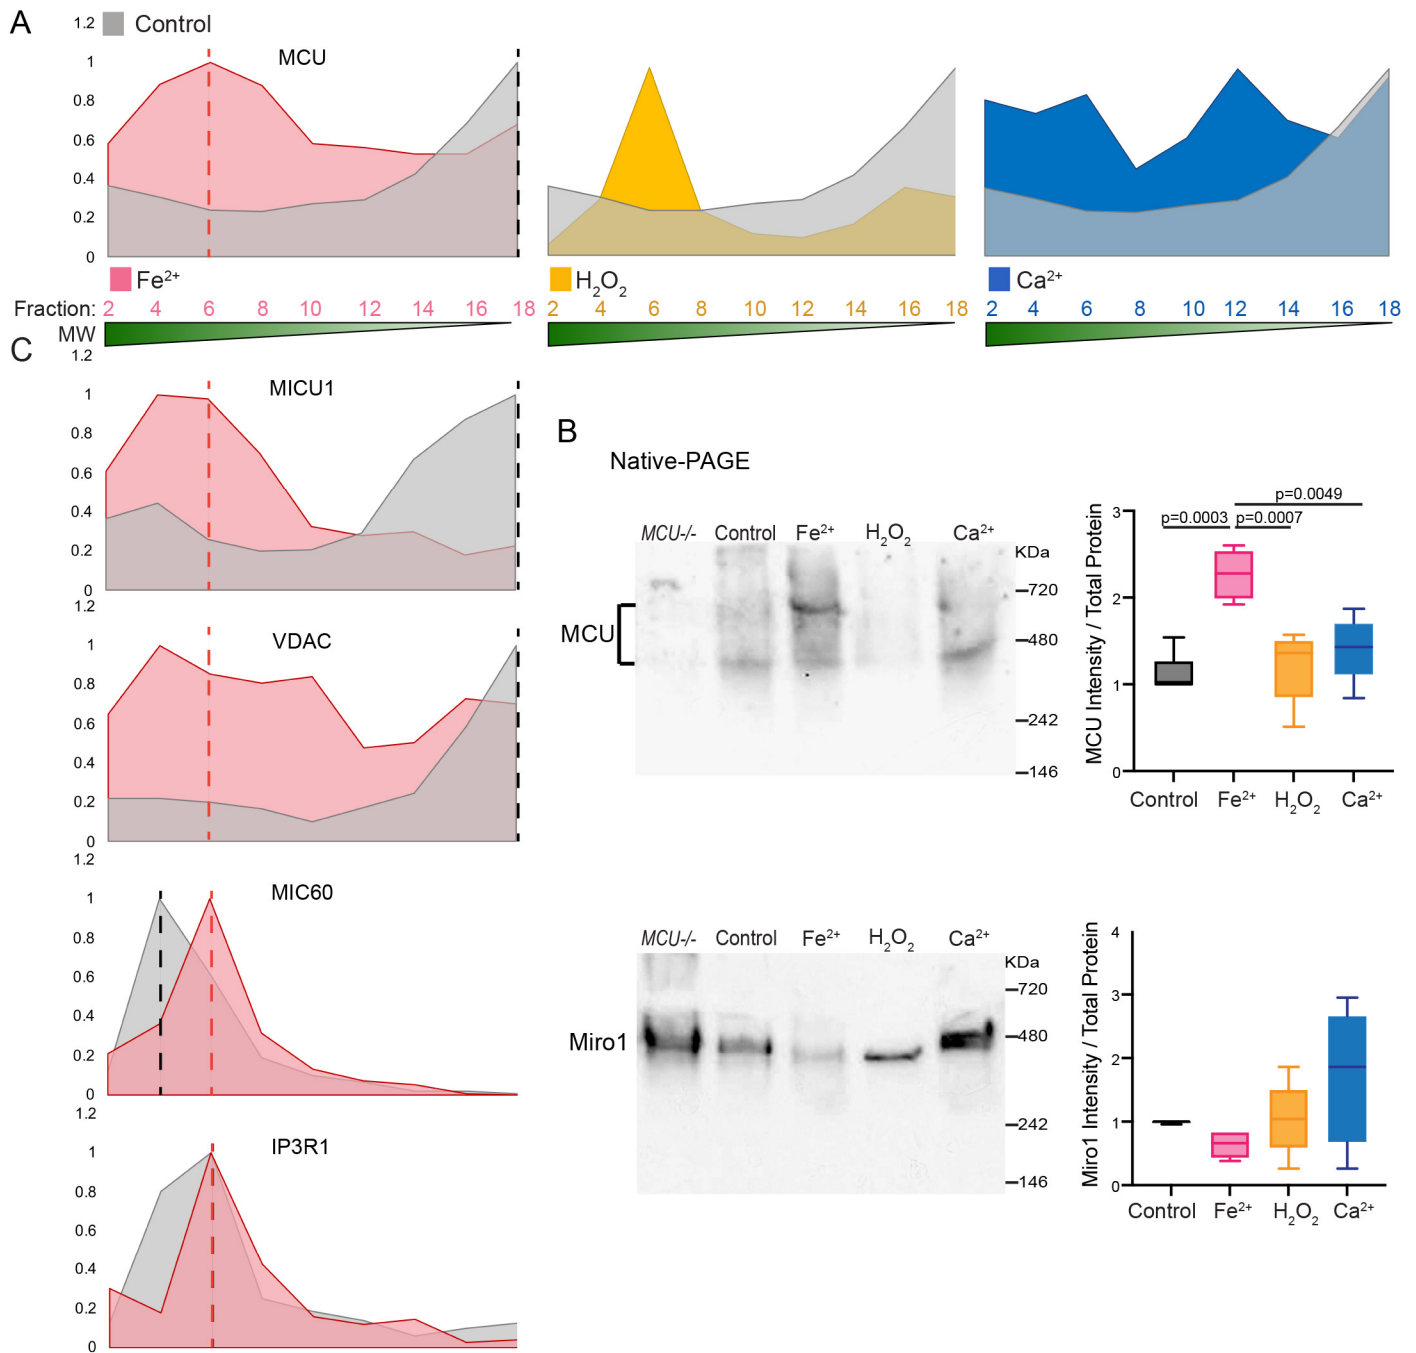

**Figure 5. Iron Promotes MCU Oligomerization.** (A) Elution profiles of MCU from SEC samples. (B) HEK cells were treated similarly as above, run in Native-PAGE, and blotted. Right: Qualifications of the band intensities normalized to the total protein amount measured by BCA.  $n=5$  independent experiments. One-Way Anova Post Hoc Tukey Test. (C) Elution profiles of additional proteins from SEC samples.

228 SEC is a sensitive method to detect protein composition dynamics, while Native-PAGE can determine  
229 the overall form and amount of a multimeric native protein. The human MCU oligomer bands from HEK  
230 cells migrated between 400-700 KDa in Native-PAGE (Figure 5B; the negative control in the left lane,  
231 *MCU*<sup>-/-</sup>, showed no signal) (Baughman et al., 2011; Ghosh et al., 2020; Tomar et al., 2016). Importantly,  
232 we found that Fe<sup>2+</sup> treatment, but not Ca<sup>2+</sup> or H<sub>2</sub>O<sub>2</sub>, resulted in an increase in the total intensity of the  
233 MCU oligomer bands (Figure 5B). Miro1 protein also oligomerized and migrated as a single band around  
234 480 KDa in Native-PAGE, which was not significantly affected by any of these treatments (Figure 5B).  
235 These data indicate that iron not only shifts the MCU complexes to higher-order oligomers but also  
236 enlarges the total number of these complexes, and thus may have a more profound impact on the MCU  
237 activity than Ca<sup>2+</sup> and H<sub>2</sub>O<sub>2</sub>.

238 We next examined additional membrane proteins that may assist the MCU function using HEK cells.  
239 By detecting total protein levels using Western blotting, we found when Fe<sup>2+</sup> was added in media and lysis  
240 buffer, MCUB and NCLX were lowered, but not any other proteins examined (Figure S5). MCUB is an  
241 inhibitor of MCU (Lambert et al., 2019), and NCLX is an IMM exchanger believed for mitochondrial  
242 Ca<sup>2+</sup>-extrusion (Lee et al., 2016; Palty et al., 2010). The reduction of both proteins could exacerbate the  
243 phenotype of mitochondrial Ca<sup>2+</sup>-overload. By evaluating oligomeric dynamic changes using SEC, we  
244 found that the OMM channel, VDAC, and MCU's gating regulator, MICU1, showed a matching elution  
245 pattern with MCU, and the treatment of Fe<sup>2+</sup> shifted all 3 proteins to the similar earlier fractions of higher  
246 order oligomers, which coincided with the elution peak of MIC60, a core structural protein at the crista  
247 junctions and contact sites (Zerbes et al., 2012), and IP3R1, the major ER Ca<sup>2+</sup>-channel that delivers Ca<sup>2+</sup>  
248 to the OMM (Katona et al., 2022) (Figure 5A, C). These data are consistent with VDAC, MICU1, and  
249 MCU being associated in the same super-complexes and suggest a possible spatial reorganization of the  
250 MCU super-complexes upon iron elevation, thus allowing easier access to ER Ca<sup>2+</sup> supply. Taken together,



251 our results show that iron promotes MCU oligomerization and may cause  $\text{Ca}^{2+}$ -accumulation inside the  
252 mitochondria.

253

### 254 **$\text{Fe}^{2+}$ binds to the MCU complex and acts on its $\text{Ca}^{2+}$ -import ability**

255 We probed the mechanism underlying the observed impact of iron on MCU oligomerization (Figure 5A-  
256 B). One hypothesis was that the MCU complex bound to iron leading to conformational changes. To  
257 explore this possibility, we immunoprecipitated (IP) endogenous MCU from HEK cells and detected the  
258 iron concentrations in the IP samples. We found significantly more  $\text{Fe}^{2+}$  ions pulled down with MCU  
259 when HEK cells were treated with  $\text{Fe}^{2+}$ , compared with other controls (Figure 6A). This result shows that  
260 the MCU complex interacts with  $\text{Fe}^{2+}$ . To determine whether MCU directly bound to  $\text{Fe}^{2+}$ , we switched  
261 our experiments to an in vitro setting. To circumvent the problem of precipitation caused by a fast speed  
262 of  $\text{Fe}^{2+}$  oxidation in vitro, we used an  $\text{Fe}^{2+}$  mimic,  $\text{Co}^{2+}$  ion (Billesbolle et al., 2020). We first confirmed  
263 that  $\text{Co}^{2+}$  behaved similarly as  $\text{Fe}^{2+}$  in our functional assays in HEK cells:  $\text{Co}^{2+}$  treatment increased MCU  
264 oligomerization detected by Native-PAGE (Figure 6B), just like  $\text{Fe}^{2+}$  (Figures 5B, 6B), and both  $\text{Fe}^{2+}$  and  
265  $\text{Co}^{2+}$  treatment enhanced the mitochondrial  $\text{Ca}^{2+}$ -uptake ability following thrombin application (Figure  
266 6C). Using fluorescence-detection SEC on purified human MCU protein (Fan et al., 2020), we found that  
267  $\text{Co}^{2+}$  caused the formation of higher-order oligomers of MCU, and decreased MCU protein stability with  
268 increased temperature (Figure 6D-E). These results demonstrate that the  $\text{Fe}^{2+}$  mimic,  $\text{Co}^{2+}$ , directly binds  
269 to MCU, increasing its oligomerization.

270 We next searched for amino acid residues in the matrix domain of MCU (PDB: 5KUE) predicted to  
271 bind to  $\text{Fe}^{2+}$  using an in-silico program (<http://bioinfo.cmu.edu.tw/MIB/>) (Lin et al., 2016; Lu et al., 2012),  
272 and found 3 amino acids: 74D, 148D, and 159H. The latter 2 residues were also predicted to bind to  $\text{Co}^{2+}$ .  
273 We mutated these 3 sites to Alanine (named “MCU-3A”). Indeed, we detected significantly less  $\text{Fe}^{2+}$

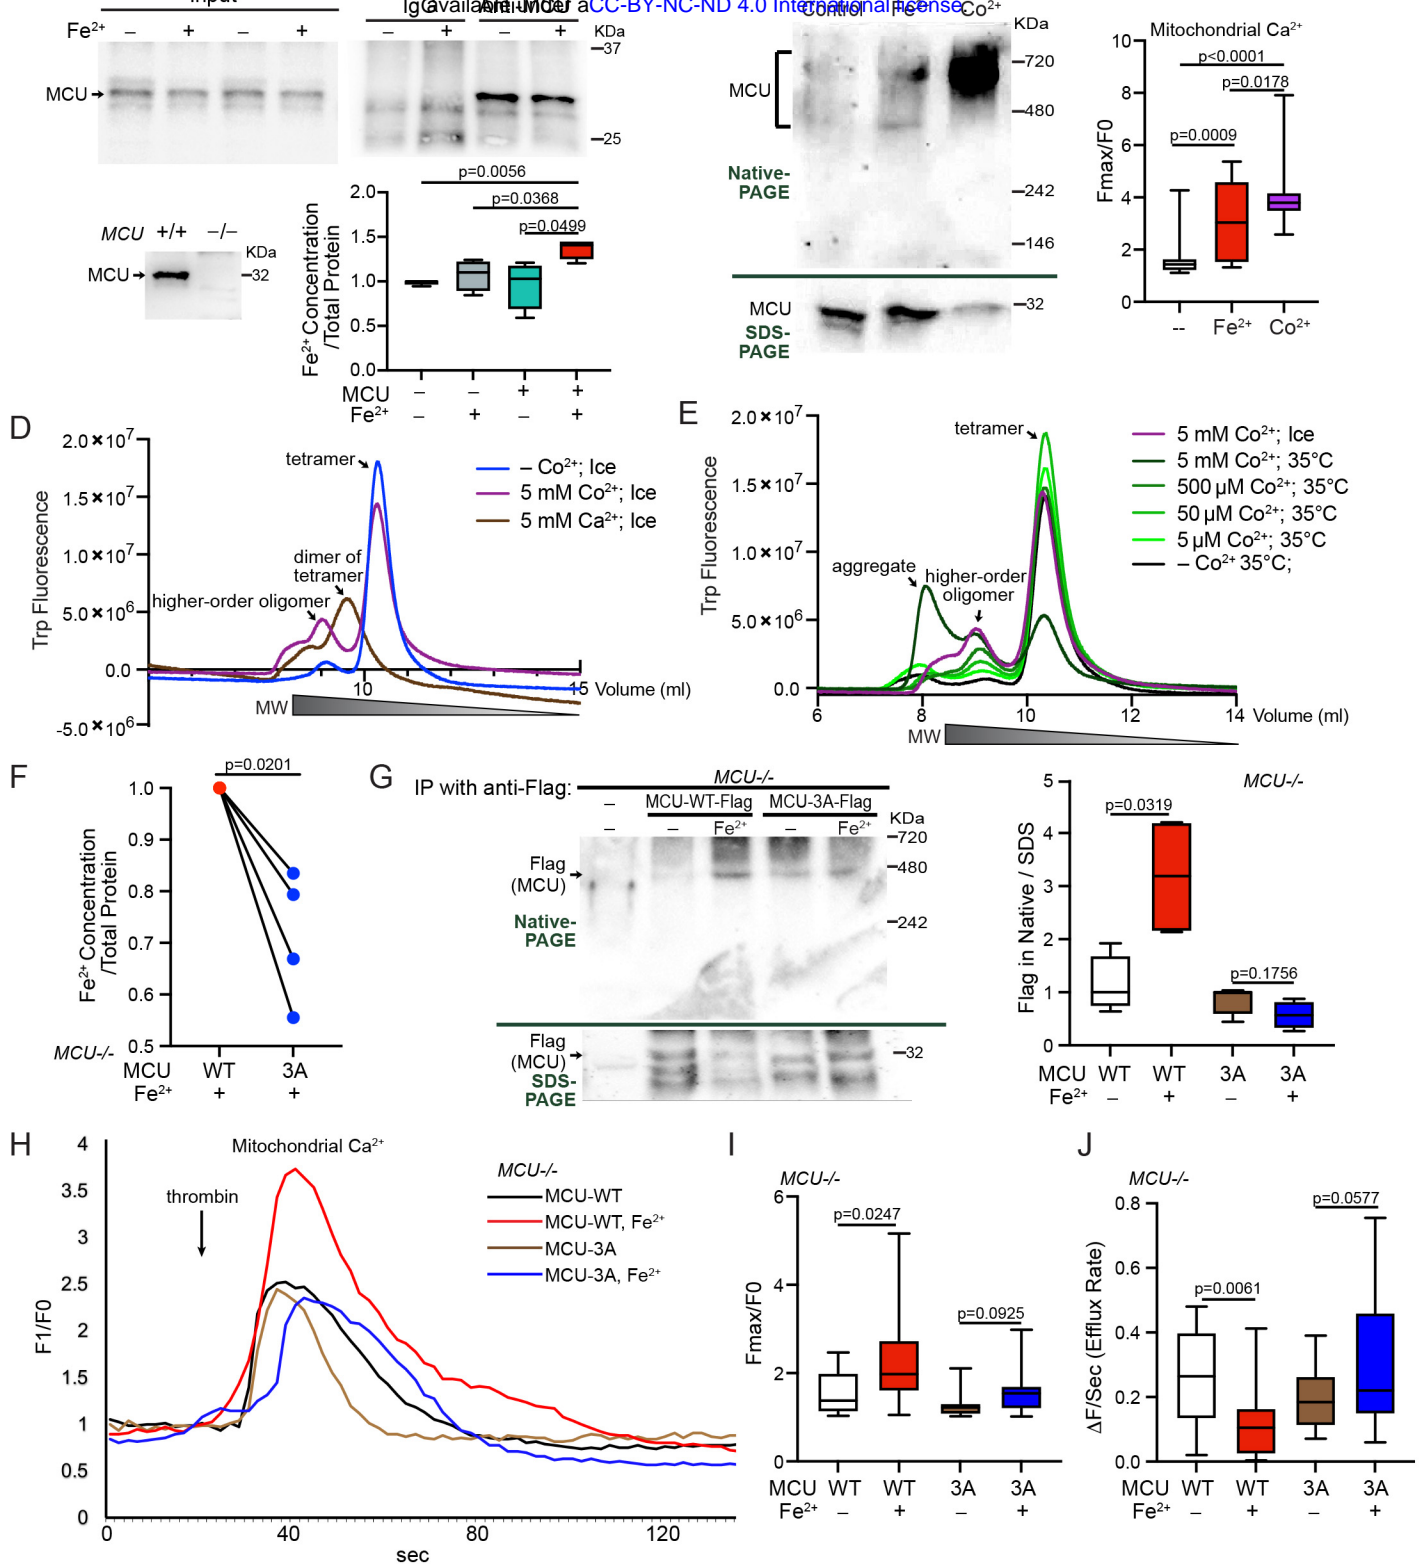

Figure 6. MCU Binds to Fe<sup>2+</sup>. (A) HEK cells were treated with or without 5 mM Fe<sup>2+</sup> for 21 hours, then IPed with rabbit IgG or anti-MCU, and Fe<sup>2+</sup> concentrations in the IP samples were detected. n=4 independent experiments. Top western blots demonstrated the success of IP. Anti-MCU was validated using MCU<sup>-/-</sup> HEK cell lysate (bottom panel). Arrow indicates the MCU band. (B) HEK cells were treated with 5 mM Fe<sup>2+</sup> or Co<sup>2+</sup> for 22 hours and lysed in buffer containing the same metal. Lysates were run in Native- or SDS-PAGE and blotted with anti-MCU. Similar results were seen for at least 3 times. (C) HEK cells treated with 5 mM Fe<sup>2+</sup> or 500 μM Co<sup>2+</sup> for 22 hours were stimulated with thrombin and mitochondrial Ca<sup>2+</sup> levels (Rhod-2) were measured. The peak fluorescent intensity normalized to baseline is quantified. n=20 cells from 4 independent coverslips. (D-E) Fluorescence-detection SEC profiles of purified human MCU. The annotation of the peaks is based on (Fan et al., 2018; Fan et al., 2020). (F) MCU<sup>-/-</sup> HEK cells transfected as indicated were treated with 5 mM Fe<sup>2+</sup> for 20 hours, then IPed with anti-Flag, and Fe<sup>2+</sup> concentrations in the IP samples were detected. Two-tailed paired T Test. (G) Left: Representative blots of IP with anti-Flag using cell lysates as indicated, run in Native- or SDS-PAGE. Right: Quantification of the band intensity of MCU-Flag in Native-PAGE normalized to that in SDS-PAGE from the same experiment. n=4 independent experiments. (H) HEK cells treated as indicated were stimulated with thrombin and mitochondrial Ca<sup>2+</sup> levels (Rhod-2) were measured. Representative traces of Ca<sup>2+</sup> ions. (I-J) Based on traces like in (H), the peak fluorescent intensity normalized to baseline (I) or efflux rate (J) is quantified. n=17 cells from 4 independent coverslips. Two-tailed Welch's T Test for all panels except (F).

274 bound to Flag-tagged MCU-3A, as compared to MCU-WT, produced from HEK cells without endogenous  
275 MCU (*MCU*<sup>-/-</sup>) (Figure 6F). To determine whether these mutations were sufficient to eliminate the Fe<sup>2+</sup>-  
276 triggered oligomerization of MCU, we expressed MCU-WT or MCU-3A in *MCU*<sup>-/-</sup> HEK cells, treated  
277 these cells with Fe<sup>2+</sup>, and ran the IPed proteins in Native-PAGE. As expected, MCU-3A abolished MCU's  
278 response to Fe<sup>2+</sup> treatment: the MCU oligomer band intensity was no longer increased (Figure 6G). We  
279 then live imaged mitochondrial Ca<sup>2+</sup>-dynamics, as described in Figure 4, in these cells. We consistently  
280 observed a larger mitochondrial Ca<sup>2+</sup>-elevation following thrombin stimulation in MCU-WT-transfected  
281 HEK cells treated with Fe<sup>2+</sup> as compared to no Fe<sup>2+</sup>-treatment, and MCU-3A blunted the peak increase  
282 (Figure 6H-I). Because Fe<sup>2+</sup> also lowered NCLX levels (Figure S5) which could affect mitochondrial Ca<sup>2+</sup>-  
283 extrusion, we measured the mitochondrial Ca<sup>2+</sup>-efflux rate. Indeed, Fe<sup>2+</sup> treatment slowed the efflux rate,  
284 which was prevented by MCU-3A (Figure 6J), suggesting that the Fe<sup>2+</sup>-triggered efflux delay might  
285 depend on Ca<sup>2+</sup>-overload. Altogether, our results show that Fe<sup>2+</sup> binds to the MCU complex, promoting  
286 MCU oligomerization and its channel activity.

287

### 288 **Iron functions upstream of calcium to mediate phenotypes of PD neurons**

289 Our discovery of the action of Fe<sup>2+</sup> on the MCU activity (Figures 5-6) suggested that in PD neurons, the  
290 phenotype of mitochondrial Ca<sup>2+</sup>-overload (Figure 4) might depend on iron. To confirm their causal  
291 relation, we treated PD neurons with deferiprone (DFP), an iron chelator (Munson et al., 2021). Indeed,  
292 DFP significantly reduced mitochondrial Ca<sup>2+</sup>-accumulation following thrombin stimulation (Figure 7A)  
293 and prevented cell death triggered by Antimycin A treatment (Figure 7B) in iPSC-derived neurons from  
294 the familial PD patient described earlier. We treated neurons from a second, sporadic patient with DFP  
295 and saw a similar neuroprotective effect (Figure 7B). In vivo, feeding the fly model of PD as shown earlier  
296 (Figures 2-3) with DFP consistently rescued the PD-relevant phenotypes, including age-dependent DA

297 neuron loss and locomotor decline (Figure 7C-D). Collectively, our results show that iron functions  
298 upstream of calcium to mediate neurodegeneration in PD models.

299  
300 **MCU, MCUb, and NCLX are affected in PD postmortem brain**

301 Our finding showing that iron impacts mitochondrial  $\text{Ca}^{2+}$ -channels and transporters (Figure 5, 6B, S5)  
302 prompted us to examine these proteins in postmortem brains of people with PD, diffuse Lewy body disease  
303 (DLBD), or Alzheimer's disease (AD) (Table S3). We homogenized the frontal cortex and ran the brain  
304 lysate in Native- or SDS-PAGE. We focused on MCU oligomers, NCLX, and MCUb, which were shown  
305 earlier specifically altered by  $\text{Fe}^{2+}$  treatment in HEK cells (Figure 5B, 6B, S5). We found the PD group  
306 clustered and separated from the healthy control group, with higher intensity of the MCU oligomer bands  
307 and lower intensity of both the NCLX and MCUb bands (Figure 7E), similar to the observations in HEK  
308 cells treated with  $\text{Fe}^{2+}$  (Figure 5B, 6B, S5). This unique clustering was not observed in the AD or DLBD  
309 group (Figure 7E, S6). Together, our data suggest that the combined functional impairment of MCU,  
310 MCUb, and NCLX may be one of the molecular signatures shared by people with PD.

311  
312 **Miro1 in blood cells reflects PD status and responds to drug treatment**

313 Now we have demonstrated a functional axis of iron-calcium-Miro in neurons of our PD models and  
314 patients. We next sought evidence of its impairment in peripheral tissues of PD patients, which could  
315 serve as an excellent candidate for biomarker and pharmacodynamic marker development. Measuring the  
316 combined impairment of MCU oligomerization, MCUb, and NCLX requires a large amount of protein  
317 and Native-PAGE, which is not applicable for high-throughput screening and clinical practice. We then  
318 explored Miro1, whose slower degradation following mitochondrial depolarization was downstream of  
319  $\text{Ca}^{2+}$ -dysregulation in our PD models, as shown earlier (Figures 1-3). Notably, we have previously found

320 that in skin fibroblasts and iPSCs the delay of Miro1 degradation upon depolarization distinguishes PD  
321 patients and genetic carriers from healthy controls (Hsieh et al., 2019; Hsieh et al., 2016; Nguyen et al.,  
322 2021). Although fibroblasts can be readily obtained by a skin biopsy, a blood test remains the most  
323 convenient method. We investigated whether Miro1 could be detected in peripheral blood mononuclear  
324 cells (PBMCs) acquired from a blood draw. We cultured PBMCs from a healthy donor from the Stanford  
325 Blood Center (SBC, Table S4) and depolarized the mitochondrial membrane potential using two different  
326 methods: Antimycin A plus Oligomycin (Ordureau et al., 2020), or CCCP. We found that both  
327 depolarizing approaches caused the degradation of Miro1 and additional mitochondrial markers in a time-  
328 dependent manner, detected by Western blotting (Figure S7A-B), consistent with other cell types (Hsieh  
329 et al., 2019; Hsieh et al., 2016; Nguyen et al., 2021).

330 To enable high-content screening, we applied an enzyme-linked immunosorbent assay (ELISA) of  
331 Miro1 (Figure S7C-D) to PBMCs from the same donor with 6-hour CCCP treatment. We saw a similar  
332 Miro1 response to CCCP using ELISA (SBC, Table S4). We then used this ELISA to screen a total of 80  
333 healthy controls and 107 PD patients (Table S4). Miro1 Ratio (Miro1 protein value with CCCP divided  
334 by that with DMSO from the same person) was significantly higher in PD patients compared to healthy  
335 controls (Figure 7F, Table S4), indicating that Miro1 is more stable upon depolarization in PD patients.

336 To determine whether our method could be used to classify an individual into a PD or healthy group,  
337 we employed machine learning approaches using our dataset. We trained a logistic regression model to  
338 assess the impact of Miro1 Ratio on PD diagnosis, solely on its own or combined with additional  
339 demographic and clinical parameters (Method). Unified Parkinson's Disease Rating Scale (UPDRS) is a  
340 tool to measure motor and non-motor symptoms of PD which may reflect disease severity and progression.  
341 Using UPDRS, our model yielded an accuracy (an individual was correctly classified as with PD or  
342 healthy) of 81.2% ( $p < 0.000001$ ; area under the Receiver Operator Curve (ROC)–AUC=0.822), and using



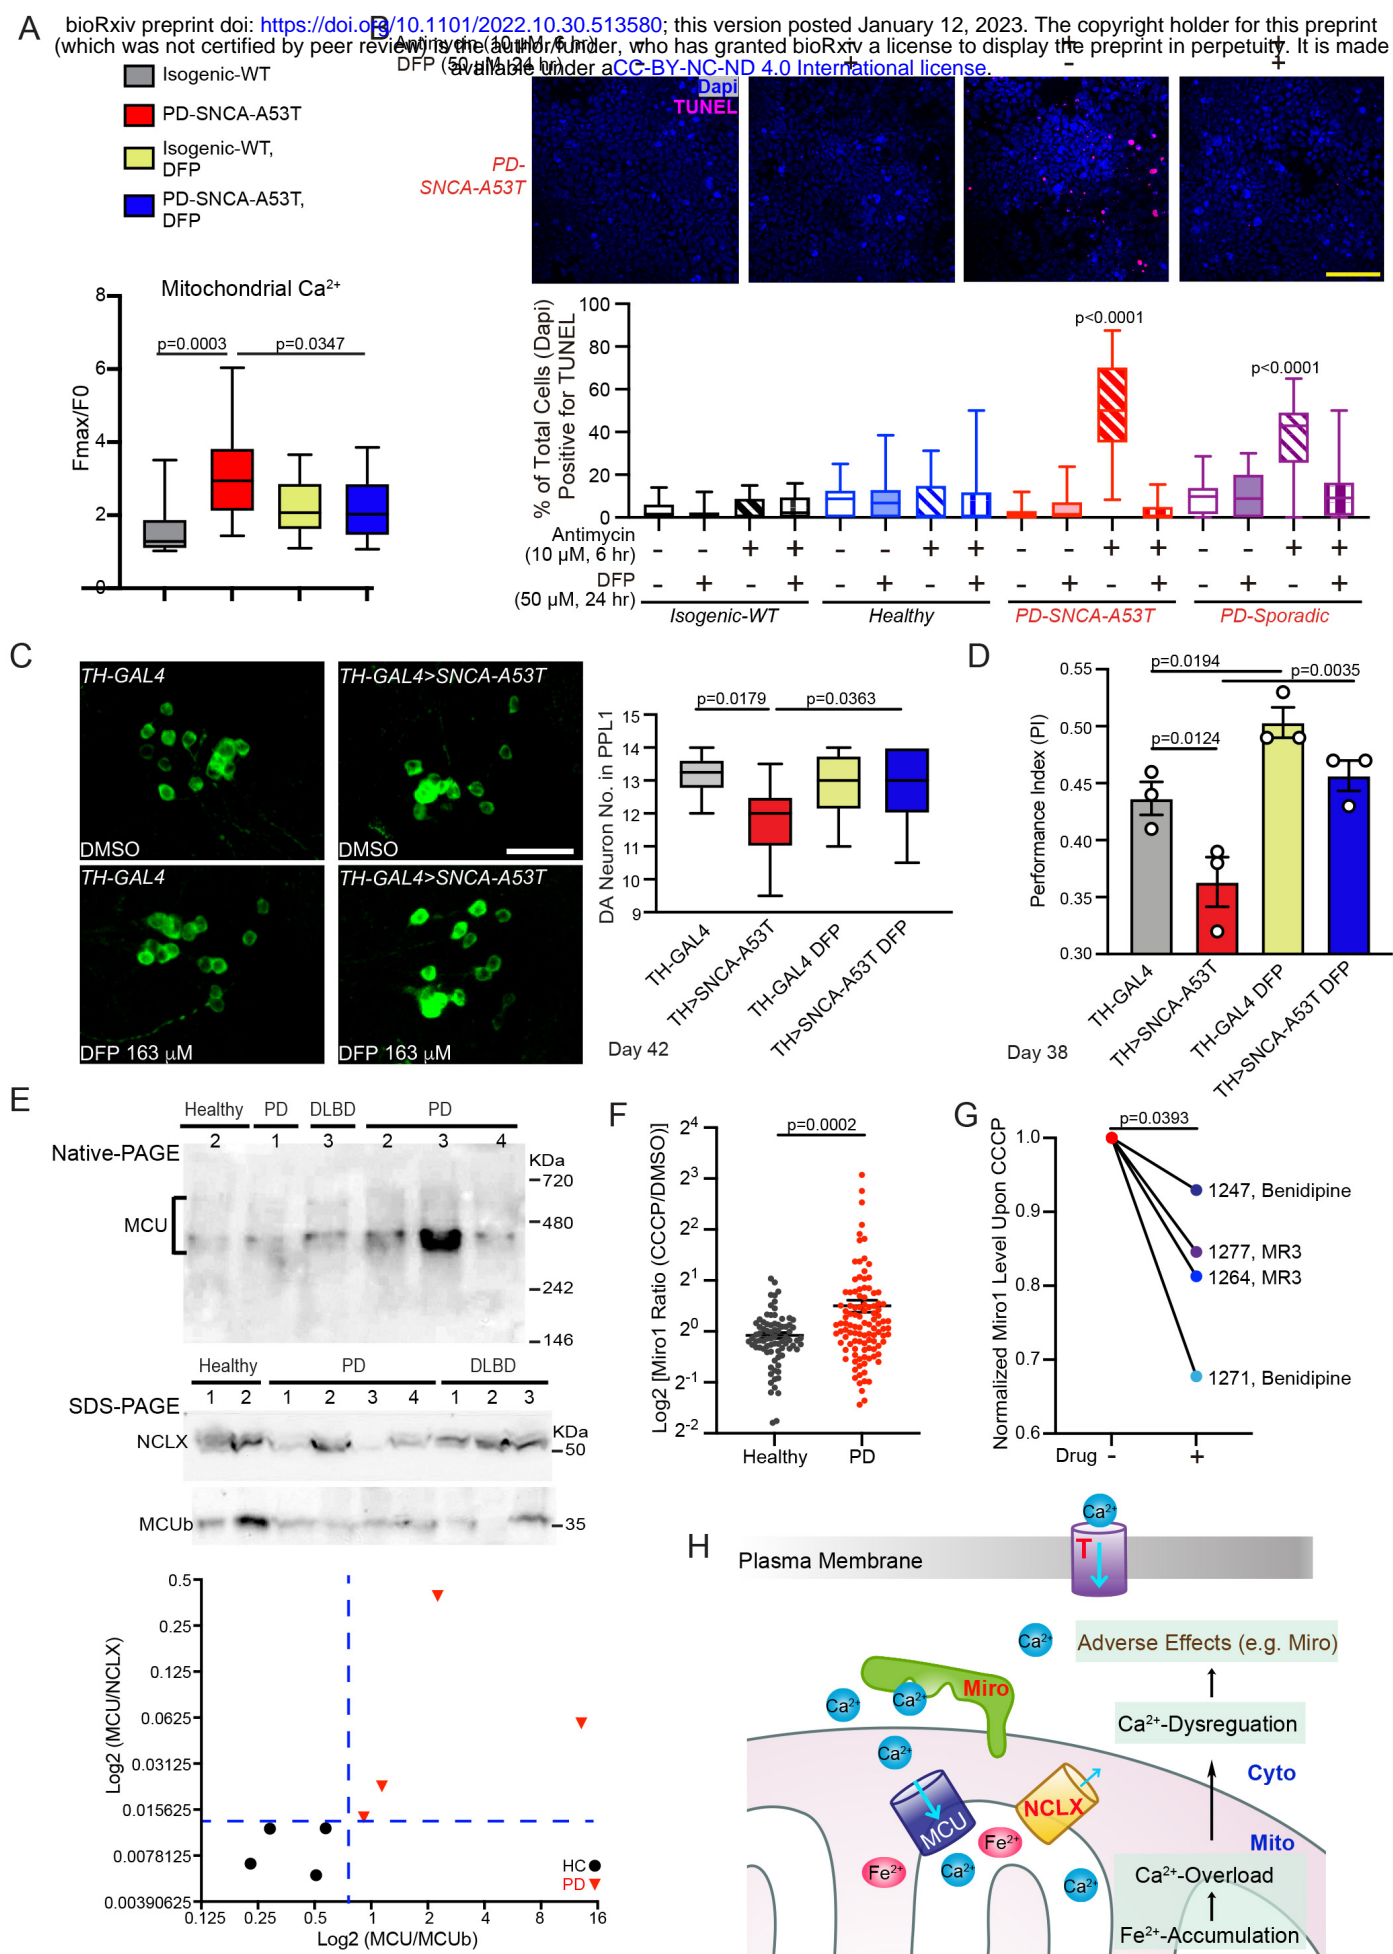

Figure 7. Chelating Iron Restores Ca<sup>2+</sup> and neuronal homeostasis in PD neurons. (A) Similar to Figure 4, iPSC-derived neurons from a PD patient with SNCA-A53T and the isogenic control, with or without treatment of 100  $\mu$ M DFP for 24 hours, were stimulated with thrombin, and mitochondrial Ca<sup>2+</sup> (Rhod-2) was measured. Quantifications of the peak fluorescent intensity normalized to baseline. n=15 cell bodies from 3 independent coverslips. Control data without DFP treatment are the same as in Figure 4. One-Way Anova Post Hoc Tukey Test. (B) iPSC-derived neurons treated as indicated, were immunostained with TUNEL and Dapi, and imaged under a confocal microscope. Scale bar: 50  $\mu$ m. Below: Quantification of the percentage of TUNEL-positive neurons. n=20 images from 3 independent coverslips. P values are compared within each genotype (significant compared to every other condition) with One-Way Anova Post Hoc Tukey Test. (C) The DA neuron number was counted in the PPL1 cluster of flies with indicated genotypes and conditions. Drug treatment was started from adulthood (day 1). Scale bar: 20  $\mu$ m. n=6, 9, 8, 7 (from left to right). (D) The Performance Index was measured in flies. Drug treatment was started from embryogenesis. n=35, 33, 40, 34 flies (from left to right), 3 independent experiments. (C-D) One-Way Anova Post Hoc Tukey Test. (E) Postmortem brains were run in Native- or SDS-PAGE and blotted. The band intensity normalized to the total protein level measured by BCA is divided by that of the universal control on the same blot: CVD (cardiovascular disease), which was included on every blot. The MCU oligomer bands in Native-PAGE and the NCLX and MCUB bands in SDS-PAGE (average of 3 replicates) are used in the plot. HC: healthy control. (F) Miro1 protein levels were measured using ELISA in PBMCs treated with DMSO or 40  $\mu$ M CCCP for 6 hours. Miro1 Ratio is calculated by dividing the Miro1 value treated with CCCP by that with DMSO from the same subject. Dot plot with Mean $\pm$ S.E.M. n=80 healthy controls and 107 PD. Two-tailed Welch's T Test. (G) PBMCs from 4 PD patients were treated with 40  $\mu$ M CCCP for 6 hours, or pretreated with 10  $\mu$ M Benidipine or MR3 for 18 hours and then with 40  $\mu$ M CCCP for another 6 hours, and Miro1 protein was detected using ELISA. Patient IDs are the same as in Table S4. Two-tailed paired T Test. (H) Schematic representation of the iron-calcium-Miro axis discovered in this study. Red texts show genes containing variants associated with PD status.

343 Miro1 Ratio, the accuracy was 67.6% (p=0.03; AUC=0.677). Notably, if both Miro1 Ratio and UPDRS  
344 were considered, our model generated an improved accuracy of 87.8% (p=0.02; AUC=0.878), without the  
345 interference of age or sex (Method, Figure S7E-F). Therefore, our results suggest that the molecular  
346 (Miro1 Ratio) and symptomatic (UPDRS) evaluations may reveal independent information, and that  
347 combining both tests may more accurately categorize individuals with PD and measure their responses to  
348 experimental therapies.

349 To probe the potential utilization of this Miro1 assay in future clinical trials for stratifying patients or  
350 monitoring drug efficacy, we treated PBMCs from 4 PD patients (Table S4) with either of the two  
351 compounds known to reduce Miro1, Benidipine (Figures 1-2, S2) and Miro1 Reducer 3 (MR3) (Hsieh et  
352 al., 2019; Li et al., 2021). Miro1 protein levels upon CCCP treatment were lowered by each compound in  
353 all 4 patients (Figure 7G), showing that the Miro1 marker in PBMCs can respond to drug treatment.  
354 Collectively, our results suggest that Miro1 protein in blood cells may be used to aid in diagnosis and drug  
355 development.

356

### 357 **Rare variants in the iron-calcium-Miro pathway are associated with PD status**

358 After dissecting the functional impairment of this iron-calcium-Miro axis in PD, we explored its genetic  
359 contribution to PD. Earlier, we showed that chelating iron, blocking Miro's binding to Ca<sup>2+</sup>, or preventing  
360 Ca<sup>2+</sup>-entry into the cell all alleviated parkinsonian neurodegeneration (Figures 2, 3, 7). We evaluated the  
361 genes encoding the protein targets of these approaches, which are spatially distinct and localized to three  
362 subcellular locations: (1) IMM Ca<sup>2+</sup>-channels and transporters (targeted by Fe<sup>2+</sup>), (2) the Ca<sup>2+</sup>-binding  
363 protein Miro on the OMM, and (3) plasma membrane Ca<sup>2+</sup>-channels (targeted by Benidipine and Tranilast)  
364 (Figure 7H, Table S5). By analyzing common variants within or near any of the investigated genes in  
365 GWAS reported in (Nalls et al., 2019), we did not observe significant association with PD clinical status.



366 We next employed the whole-genome sequencing (WGS) data from the Accelerating Medicines  
367 Partnership–Parkinson’s Disease (AMP–PD) (1,168 control; 2,241 PD), and assessed rare non-  
368 synonymous and damaging variants using burden based and SKATO methods. We discovered polygenetic  
369 vulnerability to PD at all three spatial hotspots: significant association with PD status of rare variants in  
370 selective T-type  $\text{Ca}^{2+}$ -channel subtypes (*Cav3.2*, *3.3*) (cell surface), *Miro2* (OMM), and *NCLX* (IMM)  
371 (Table S5). A SKATO Test on all variants of T-type or L-type  $\text{Ca}^{2+}$ -channel subtypes consistently showed  
372 significant association with PD status of T-type channels, which survived multiple comparison correction,  
373 but not of L-type channels (Table S5). Together, our analysis unravels genetic predisposition of this  $\text{Ca}^{2+}$ -  
374 pathway to PD.

375 To functionally validate the selection of T-type  $\text{Ca}^{2+}$ -channels from our human genetic study, we  
376 employed the same screening ICC assay described earlier (Figures S1-2) by which we discovered the non-  
377 selective pan- $\text{Ca}^{2+}$ -channel blocker, Benidipine, but now using 2 different specific L-type and 3 different  
378 T-type  $\text{Ca}^{2+}$ -channel blockers. Intriguingly, we again discovered a striking selection of T-type versus L-  
379 type channels, in the connection with *Miro1* in PD fibroblasts (Figure S7G): only T-type blockers  
380 promoted *Miro1* degradation following depolarization, just like Benidipine, supporting the human genetic  
381 finding. Similar to *Miro1*, *Miro2* was also resistant to depolarization-triggered degradation in PD  
382 fibroblasts (Hsieh et al., 2019) and responded to Benidipine treatment (Figure S3C). *NCLX* functionally  
383 interacts with *MCU* (Lee et al., 2016), and was coregulated with *MCUb* and *MCU* by  $\text{Fe}^{2+}$  (Figure 5B,  
384 6B, S5) and PD (Figure 7E). Although it remains elusive why rare variants in these genes are selectively  
385 associated with PD status, our combined, unbiased analyses of human genetics, tissues, cell, and in vivo  
386 models corroborate the complexity and multifactorial nature of PD etiology, and indicate that the  
387 polygenetic architecture built around this iron-calcium-Miro axis might influence an individual’s risk to  
388 develop PD.

389

## 390 **Discussion**

391 In this work, we have established a pathway of iron-calcium-Miro dysregulation in our PD models (Figure  
392 7H). Elevation of iron concentrations may cause mitochondrial  $\text{Ca}^{2+}$ -overload by promoting the MCU  
393 activity and reducing NCLX levels (Figures 4-7, S5). It is possible that the initial mitochondrial  $\text{Ca}^{2+}$ -  
394 accumulation subsequently disrupts  $\text{Ca}^{2+}$ -homeostasis at the cellular level, eliciting responses of  
395 additional  $\text{Ca}^{2+}$ -binding proteins, such as Miro (Figure 7H). We have shown multiple ways to target this  
396 axis. Chelating iron, reducing  $\text{Ca}^{2+}$ -entry into the cell, or blocking Miro's binding to  $\text{Ca}^{2+}$  is each  
397 neuroprotective (Figures 2, 3, 7). Of note, the impairment of this axis can be reflected in blood cells using  
398 a Miro1 assay with high content capacity (Figure 7F-G) and can be detected in the genome of PD patients  
399 (Table S5). Hence, this ionic axis may be important for PD pathogenesis and can be leveraged for better  
400 detecting and treating the disease.

401

402 Although the precise course of PD pathogenesis remains unclear, emerging evidence has demonstrated its  
403 complex and polygenetic nature. Interactions among multiple organs and cell types, systemic immune  
404 activation, and environmental triggers act uniquely in different individuals. Although GWAS and  
405 segregation studies have unveiled many PD risk or causal loci, rare genetic variants may be particularly  
406 important for conferring individual heterogeneity in disease onset and etiology. However, rare variants  
407 associated with PD risk are difficult to discover given the limitations in sample collection and the unmet  
408 need for exome-sequencing as opposed to sparse genotyping on microarrays. In our work, we have located  
409 several potential risk genes by first connecting them in the same biological pathway. In an individual  
410 prone to PD, there might be already mitochondrial malfunction causing mitochondrial proteins to release  
411 labile iron, or impairments in systemic iron uptake and circulation causing iron accumulation at the cellular

412 level. Any predisposed genetic perturbations in this iron-calcium-Miro axis, which could be due to  
413 different rare variants in each person, would further exacerbate its dysfunction. With or without another  
414 trigger such as a virus infection or environmental insult, the tipping point for disease onset might be  
415 reached. Thus, combining complementary genetic and functional studies may help us better understand  
416 the destructive paths leading to the disease and identify network hubs for therapeutic targeting.

417

418 Screening people for genetic variants in this iron-calcium-Miro axis and detecting Miro in blood cells may  
419 help stratify a unique population of patients and at-risk individuals, who will particularly benefit from  
420 therapeutic interventions targeting this axis. For example, treating people bearing genetic variants in  $\text{Ca}^{2+}$ -  
421 channels with  $\text{Ca}^{2+}$ -channel blockers, iron-chelators, or both, may yield the best efficacy. Similarly, people  
422 who test positive for the Miro1 phenotype in PBMCs may respond best to drugs reducing Miro1.  
423 Integrating genetic screening of this axis with Miro1 detection in peripheral tissues may enhance the  
424 accuracy of risk evaluation and help design personalized treatment, such as a cocktail of different  $\text{Ca}^{2+}$ -  
425 channel blockers, iron chelators, and Miro reducers, to improve prevention and treatment efficacy.

426

427 Calcium mishandling and iron accumulation have been widely observed in PD neurons (Angelova et al.,  
428 2020; Apicco et al., 2021; Belaidi and Bush, 2016; Buttner et al., 2013; Kim et al., 2020; Lee et al., 2018;  
429 Surmeier et al., 2017; Tabata et al., 2018; Verma et al., 2017; Vuuren et al., 2020). Now we have provided  
430 a mechanistic link.  $\text{Fe}^{2+}$  elicits mitochondrial  $\text{Ca}^{2+}$ -overload through acting on IMM  $\text{Ca}^{2+}$ -channels and  
431 transporters. Further investigations are needed to dissect how  $\text{Fe}^{2+}$  regulates MCUb and NCLX levels.  
432 One hypothesis is that these proteins are targeted by  $\text{Ca}^{2+}$ -activated mitochondrial proteases. Our results  
433 (Figure 6J) have suggested that  $\text{Fe}^{2+}$ -triggered  $\text{Ca}^{2+}$ -efflux delay depends on mitochondrial  $\text{Ca}^{2+}$ -overload.  
434 A recent study has shown that NCLX protein levels are lowered in another mitochondrial iron-dependent

435 disease, Friedreich's Ataxia (FA), through a possible mechanism dependent on calpain cleavage (Britti et  
436 al., 2021). Intriguingly, iron chelators have displayed promising therapeutic benefits in preclinical models  
437 of both PD (Clark et al., 2020) and FA (Llorens et al., 2019), and is currently in multiple clinical trials for  
438 treating symptoms of PD patients (Clark et al., 2020). Thus, the underlying molecular mechanisms may  
439 be shared by multiple diseases with mitochondrial iron accumulation.

440

441 The consequences to intracellular  $\text{Ca}^{2+}$ -dysfunction could be profound and detrimental. Dissecting these  
442 downstream details in PD will help us find more powerful targets and biomarkers. Mitochondrial  $\text{Ca}^{2+}$ -  
443 overload could overwhelm the oxidative phosphorylation system (Ashrafi et al., 2020), damaging the  
444 electron transport chain. Malfunctions of MCU and NCLX may disrupt spatially discrete  $\text{Ca}^{2+}$  transients  
445 and oscillations adjacent to ER membranes, leading to defects in autophagy (Zheng et al., 2022), which  
446 may consequently cause protein aggregation and lysosomal dysfunction. Intriguingly, chelating iron can  
447 induce selective autophagy pathways (Wilhelm et al., 2022), raising the question whether MCU and local  
448  $\text{Ca}^{2+}$  dynamics are involved in iron-mediated autophagy.  $\text{Ca}^{2+}$  may be also important for safeguarding  
449 mitochondrial quality. Miro appears to be a molecular switch between distinct routes of mitochondrial  
450 quality control. Proteasomal degradation of Miro dissociates mitochondria from microtubules and allows  
451 the entire damaged mitochondria to enter the mitophagy pathway (Chan et al., 2011; Hsieh et al., 2016;  
452 Wang et al., 2011), whereas sustaining Miro on the microtubule motors is required for the biogenesis of  
453 mitochondrial derived vesicles (MDVs) that deliver a subset of mitochondrial proteins (including Miro)  
454 to lysosomes (Konig et al., 2021). Notably, MDVs occur under mild oxidative stress or at steady state,  
455 and before mitophagy which is triggered by extended damage (Konig et al., 2021; Lin et al., 2017;  
456 McLelland et al., 2014). Miro may also ride with those damaged mitochondria expelled from neurons  
457 through nanotunnels and vesicles (Ahmad et al., 2014; Davis et al., 2014; Melentijevic et al., 2017; Rosina

458 et al., 2022; Saha et al., 2022). Perhaps it starts with only one of these biological processes impaired by  
459  $\text{Ca}^{2+}$  signals, leading to Miro retention on damaged mitochondria, which further affects more Miro-  
460 dependent quality control pathways. More studies are needed to unravel the precise roles of Miro and  
461 other  $\text{Ca}^{2+}$ -binding proteins in PD pathogenesis and how  $\text{Ca}^{2+}$  regulates these roles. The physical and  
462 functional interactions of these  $\text{Ca}^{2+}$ -binding proteins with specific  $\text{Ca}^{2+}$ -channels in plasma,  
463 mitochondrial, or additional organellar membranes, may constitute the core underlying mechanisms.

464

## 465 REFERENCES

- 466 Ahmad, T., Mukherjee, S., Pattnaik, B., Kumar, M., Singh, S., Kumar, M., Rehman, R., Tiwari, B.K.,  
467 Jha, K.A., Barhanpurkar, A.P., *et al.* (2014). Miro1 regulates intercellular mitochondrial transport &  
468 enhances mesenchymal stem cell rescue efficacy. *The EMBO journal* *33*, 994-1010.
- 469 Angelova, P.R., Choi, M.L., Berezhnov, A.V., Horrocks, M.H., Hughes, C.D., De, S., Rodrigues, M.,  
470 Yapom, R., Little, D., Dolt, K.S., *et al.* (2020). Alpha synuclein aggregation drives ferroptosis: an  
471 interplay of iron, calcium and lipid peroxidation. *Cell death and differentiation* *27*, 2781-2796.
- 472 Apicco, D.J., Shlevkov, E., Nezich, C.L., Tran, D.T., Guilmette, E., Nicholatos, J.W., Bantle, C.M.,  
473 Chen, Y., Glajch, K.E., Abraham, N.A., *et al.* (2021). The Parkinson's disease-associated gene ITPKB  
474 protects against alpha-synuclein aggregation by regulating ER-to-mitochondria calcium release.  
475 *Proceedings of the National Academy of Sciences of the United States of America* *118*.
- 476 Ashrafi, G., de Juan-Sanz, J., Farrell, R.J., and Ryan, T.A. (2020). Molecular Tuning of the Axonal  
477 Mitochondrial  $\text{Ca}^{2+}$  Uniporter Ensures Metabolic Flexibility of Neurotransmission. *Neuron* *105*, 678-  
478 687 e675.
- 479 Baughman, J.M., Perocchi, F., Girgis, H.S., Plovanich, M., Belcher-Timme, C.A., Sancak, Y., Bao,  
480 X.R., Strittmatter, L., Goldberger, O., Bogorad, R.L., *et al.* (2011). Integrative genomics identifies MCU  
481 as an essential component of the mitochondrial calcium uniporter. *Nature* *476*, 341-345.
- 482 Belaidi, A.A., and Bush, A.I. (2016). Iron neurochemistry in Alzheimer's disease and Parkinson's  
483 disease: targets for therapeutics. *Journal of neurochemistry* *139 Suppl 1*, 179-197.
- 484 Billesbolle, C.B., Azumaya, C.M., Kretsch, R.C., Powers, A.S., Gonen, S., Schneider, S., Arvedson, T.,  
485 Dror, R.O., Cheng, Y., and Manglik, A. (2020). Structure of hepcidin-bound ferroportin reveals iron  
486 homeostatic mechanisms. *Nature* *586*, 807-811.
- 487 Britti, E., Delaspre, F., Tamarit, J., and Ros, J. (2021). Calpain-Inhibitors Protect Frataxin-Deficient  
488 Dorsal Root Ganglia Neurons from Loss of Mitochondrial  $\text{Na}^{+}/\text{Ca}^{2+}$  Exchanger, NCLX, and  
489 Apoptosis. *Neurochem Res* *46*, 108-119.
- 490 Buttner, S., Faes, L., Reichelt, W.N., Broeskamp, F., Habernig, L., Benke, S., Kourtis, N., Ruli, D.,  
491 Carmona-Gutierrez, D., Eisenberg, T., *et al.* (2013). The  $\text{Ca}^{2+}/\text{Mn}^{2+}$  ion-pump PMR1 links elevation of  
492 cytosolic  $\text{Ca}^{2+}$  levels to alpha-synuclein toxicity in Parkinson's disease models. *Cell death and*  
493 *differentiation* *20*, 465-477.

- 494 Chan, N.C., Salazar, A.M., Pham, A.H., Sweredoski, M.J., Kolawa, N.J., Graham, R.L., Hess, S., and  
495 Chan, D.C. (2011). Broad activation of the ubiquitin-proteasome system by Parkin is critical for  
496 mitophagy. *Human molecular genetics* *20*, 1726-1737.
- 497 Clark, E.H., Vazquez de la Torre, A., Hoshikawa, T., and Briston, T. (2020). Targeting mitophagy in  
498 Parkinson's disease. *The Journal of biological chemistry*.
- 499 Darakhshan, S., and Pour, A.B. (2015). Tranilast: a review of its therapeutic applications. *Pharmacol*  
500 *Res* *91*, 15-28.
- 501 Davis, C.H., Kim, K.Y., Bushong, E.A., Mills, E.A., Boassa, D., Shih, T., Kinebuchi, M., Phan, S.,  
502 Zhou, Y., Bihlmeyer, N.A., *et al.* (2014). Transcellular degradation of axonal mitochondria. *Proceedings*  
503 *of the National Academy of Sciences of the United States of America* *111*, 9633-9638.
- 504 Diaz-Ortiz, M.E., Seo, Y., Posavi, M., Carceles Cordon, M., Clark, E., Jain, N., Charan, R., Gallagher,  
505 M.D., Unger, T.L., Amari, N., *et al.* (2022). GPNMB confers risk for Parkinson's disease through  
506 interaction with alpha-synuclein. *Science* *377*, eabk0637.
- 507 Dong, Z., Shanmughapriya, S., Tomar, D., Siddiqui, N., Lynch, S., Nemani, N., Breves, S.L., Zhang, X.,  
508 Tripathi, A., Palaniappan, P., *et al.* (2017). Mitochondrial Ca(2+) Uniporter Is a Mitochondrial Luminal  
509 Redox Sensor that Augments MCU Channel Activity. *Molecular cell* *65*, 1014-1028 e1017.
- 510 Fan, C., Fan, M., Orlando, B.J., Fastman, N.M., Zhang, J., Xu, Y., Chambers, M.G., Xu, X., Perry, K.,  
511 Liao, M., *et al.* (2018). X-ray and cryo-EM structures of the mitochondrial calcium uniporter. *Nature*  
512 *559*, 575-579.
- 513 Fan, M., Zhang, J., Tsai, C.W., Orlando, B.J., Rodriguez, M., Xu, Y., Liao, M., Tsai, M.F., and Feng, L.  
514 (2020). Structure and mechanism of the mitochondrial Ca(2+) uniporter holocomplex. *Nature* *582*, 129-  
515 133.
- 516 Ghosh, S., Basu Ball, W., Madaris, T.R., Srikantan, S., Madesh, M., Mootha, V.K., and Gohil, V.M.  
517 (2020). An essential role for cardiolipin in the stability and function of the mitochondrial calcium  
518 uniporter. *Proceedings of the National Academy of Sciences of the United States of America* *117*,  
519 16383-16390.
- 520 Hsieh, C.H., Li, L., Vanhauwaert, R., Nguyen, K.T., Davis, M.D., Bu, G., Wszolek, Z.K., and Wang, X.  
521 (2019). Miro1 Marks Parkinson's Disease Subset and Miro1 Reducer Rescues Neuron Loss in  
522 Parkinson's Models. *Cell metabolism* *30*, 1131-1140 e1137.
- 523 Hsieh, C.H., Shaltouki, A., Gonzalez, A.E., Bettencourt da Cruz, A., Burbulla, L.F., St Lawrence, E.,  
524 Schule, B., Krainc, D., Palmer, T.D., and Wang, X. (2016). Functional Impairment in Miro Degradation  
525 and Mitophagy Is a Shared Feature in Familial and Sporadic Parkinson's Disease. *Cell stem cell* *19*, 709-  
526 724.
- 527 Katona, M., Bartok, A., Nichtova, Z., Csordas, G., Berezhnaya, E., Weaver, D., Ghosh, A., Varnai, P.,  
528 Yule, D.I., and Hajnoczky, G. (2022). Capture at the ER-mitochondrial contacts licenses IP(3) receptors  
529 to stimulate local Ca(2+) transfer and oxidative metabolism. *Nature communications* *13*, 6779.
- 530 Kim, J.W., Yin, X., Jhaldiyal, A., Khan, M.R., Martin, I., Xie, Z., Perez-Rosello, T., Kumar, M.,  
531 Abalde-Atristain, L., Xu, J., *et al.* (2020). Defects in mRNA Translation in LRRK2-Mutant hiPSC-  
532 Derived Dopaminergic Neurons Lead to Dysregulated Calcium Homeostasis. *Cell stem cell* *27*, 633-645  
533 e637.
- 534 Konig, T., Nolte, H., Aaltonen, M.J., Tatsuta, T., Krols, M., Stroh, T., Langer, T., and McBride, H.M.  
535 (2021). MIROs and DRP1 drive mitochondrial-derived vesicle biogenesis and promote quality control.  
536 *Nature cell biology*.
- 537 Lambert, J.P., Luongo, T.S., Tomar, D., Jadiya, P., Gao, E., Zhang, X., Lucchese, A.M., Kolmetzky,  
538 D.W., Shah, N.S., and Elrod, J.W. (2019). MCUB Regulates the Molecular Composition of the



539 Mitochondrial Calcium Uniporter Channel to Limit Mitochondrial Calcium Overload During Stress.  
540 *Circulation* 140, 1720-1733.

541 Lee, K.S., Huh, S., Lee, S., Wu, Z., Kim, A.K., Kang, H.Y., and Lu, B. (2018). Altered ER-  
542 mitochondria contact impacts mitochondria calcium homeostasis and contributes to neurodegeneration  
543 in vivo in disease models. *Proceedings of the National Academy of Sciences of the United States of*  
544 *America* 115, E8844-E8853.

545 Lee, S.K., Shanmughapriya, S., Mok, M.C.Y., Dong, Z., Tomar, D., Carvalho, E., Rajan, S., Junop,  
546 M.S., Madesh, M., and Stathopoulos, P.B. (2016). Structural Insights into Mitochondrial Calcium  
547 Uniporter Regulation by Divalent Cations. *Cell Chem Biol* 23, 1157-1169.

548 Li, L., Conradson, D.M., Bharat, V., Kim, M.J., Hsieh, C.H., Minhas, P.S., Papakyrikos, A.M., Durairaj,  
549 A.S., Ludlam, A., Andreasson, K.I., *et al.* (2021). A mitochondrial membrane-bridging machinery  
550 mediates signal transduction of intramitochondrial oxidation. *Nat Metab.*

551 Lin, M.Y., Cheng, X.T., Tammineni, P., Xie, Y., Zhou, B., Cai, Q., and Sheng, Z.H. (2017). Releasing  
552 Syntaphilin Removes Stressed Mitochondria from Axons Independent of Mitophagy under  
553 Pathophysiological Conditions. *Neuron* 94, 595-610 e596.

554 Lin, Y.F., Cheng, C.W., Shih, C.S., Hwang, J.K., Yu, C.S., and Lu, C.H. (2016). MIB: Metal Ion-  
555 Binding Site Prediction and Docking Server. *J Chem Inf Model* 56, 2287-2291.

556 Llorens, J.V., Soriano, S., Calap-Quintana, P., Gonzalez-Cabo, P., and Molto, M.D. (2019). The Role of  
557 Iron in Friedreich's Ataxia: Insights From Studies in Human Tissues and Cellular and Animal Models.  
558 *Front Neurosci* 13, 75.

559 Lu, C.H., Lin, Y.F., Lin, J.J., and Yu, C.S. (2012). Prediction of metal ion-binding sites in proteins using  
560 the fragment transformation method. *PloS one* 7, e39252.

561 McLelland, G.L., Soubannier, V., Chen, C.X., McBride, H.M., and Fon, E.A. (2014). Parkin and PINK1  
562 function in a vesicular trafficking pathway regulating mitochondrial quality control. *The EMBO journal*  
563 33, 282-295.

564 Melentijevic, I., Toth, M.L., Arnold, M.L., Guasp, R.J., Harinath, G., Nguyen, K.C., Taub, D., Parker,  
565 J.A., Neri, C., Gabel, C.V., *et al.* (2017). *C. elegans* neurons jettison protein aggregates and  
566 mitochondria under neurotoxic stress. *Nature* 542, 367-371.

567 Munson, M.J., Mathai, B.J., Ng, M.Y.W., Trachsel-Moncho, L., de la Ballina, L.R., Schultz, S.W.,  
568 Aman, Y., Lystad, A.H., Singh, S., Singh, S., *et al.* (2021). GAK and PRKCD are positive regulators of  
569 PRKN-independent mitophagy. *Nature communications* 12, 6101.

570 Nalls, M.A., Blauwendraat, C., Vallerga, C.L., Heilbron, K., Bandres-Ciga, S., Chang, D., Tan, M., Kia,  
571 D.A., Noyce, A.J., Xue, A., *et al.* (2019). Identification of novel risk loci, causal insights, and heritable  
572 risk for Parkinson's disease: a meta-analysis of genome-wide association studies. *The Lancet Neurology*  
573 18, 1091-1102.

574 Nguyen, D., Bharat, V., Conradson, D.M., Nandakishore, P., and Wang, X. (2021). Miro1 Impairment in  
575 a Parkinson's At-Risk Cohort. *Front Mol Neurosci* 14, 734273.

576 Ordureau, A., Paulo, J.A., Zhang, J., An, H., Swatek, K.N., Cannon, J.R., Wan, Q., Komander, D., and  
577 Harper, J.W. (2020). Global Landscape and Dynamics of Parkin and USP30-Dependent Ubiquitylomes  
578 in iNeurons during Mitophagic Signaling. *Molecular cell* 77, 1124-1142 e1110.

579 Palty, R., Silverman, W.F., Hershfinkel, M., Caporale, T., Sensi, S.L., Parnis, J., Nolte, C., Fishman, D.,  
580 Shoshan-Barmatz, V., Herrmann, S., *et al.* (2010). NCLX is an essential component of mitochondrial  
581 Na<sup>+</sup>/Ca<sup>2+</sup> exchange. *Proceedings of the National Academy of Sciences of the United States of America*  
582 107, 436-441.

583 Patron, M., Tarasenko, D., Nolte, H., Kroczeck, L., Ghosh, M., Ohba, Y., Lasarzewski, Y., Ahmadi, Z.A.,  
584 Cabrera-Orefice, A., Eyiama, A., *et al.* (2022). Regulation of mitochondrial proteostasis by the proton  
585 gradient. *The EMBO journal* *41*, e110476.  
586 Rosina, M., Ceci, V., Turchi, R., Chuan, L., Borcherdig, N., Sciarretta, F., Sanchez-Diaz, M., Tortolici,  
587 F., Karlinsey, K., Chiurciu, V., *et al.* (2022). Ejection of damaged mitochondria and their removal by  
588 macrophages ensure efficient thermogenesis in brown adipose tissue. *Cell Metab.*  
589 Saha, T., Dash, C., Jayabalan, R., Khiste, S., Kulkarni, A., Kurmi, K., Mondal, J., Majumder, P.K.,  
590 Bardia, A., Jang, H.L., *et al.* (2022). Intercellular nanotubes mediate mitochondrial trafficking between  
591 cancer and immune cells. *Nat Nanotechnol* *17*, 98-106.  
592 Shaltouki, A., Hsieh, C.H., Kim, M.J., and Wang, X. (2018). Alpha-synuclein delays mitophagy and  
593 targeting Miro rescues neuron loss in Parkinson's models. *Acta Neuropathol* *136*, 607-620.  
594 Surmeier, D.J., Obeso, J.A., and Halliday, G.M. (2017). Selective neuronal vulnerability in Parkinson  
595 disease. *Nature reviews Neuroscience* *18*, 101-113.  
596 Tabata, Y., Imaizumi, Y., Sugawara, M., Andoh-Noda, T., Banno, S., Chai, M., Sone, T., Yamazaki, K.,  
597 Ito, M., Tsukahara, K., *et al.* (2018). T-type Calcium Channels Determine the Vulnerability of  
598 Dopaminergic Neurons to Mitochondrial Stress in Familial Parkinson Disease. *Stem cell reports* *11*,  
599 1171-1184.  
600 Tomar, D., Dong, Z., Shanmughapriya, S., Koch, D.A., Thomas, T., Hoffman, N.E., Timbalia, S.A.,  
601 Goldman, S.J., Breves, S.L., Corbally, D.P., *et al.* (2016). MCUR1 Is a Scaffold Factor for the MCU  
602 Complex Function and Promotes Mitochondrial Bioenergetics. *Cell Rep* *15*, 1673-1685.  
603 Verma, M., Callio, J., Otero, P.A., Sekler, I., Wills, Z.P., and Chu, C.T. (2017). Mitochondrial Calcium  
604 Dysregulation Contributes to Dendrite Degeneration Mediated by PD/LBD-Associated LRRK2 Mutants.  
605 *The Journal of neuroscience : the official journal of the Society for Neuroscience* *37*, 11151-11165.  
606 Vuuren, M.J.V., Nell, T.A., Carr, J.A., Kell, D.B., and Pretorius, E. (2020). Iron Dysregulation and  
607 Inflammagens Related to Oral and Gut Health Are Central to the Development of Parkinson's Disease.  
608 *Biomolecules* *11*.  
609 Wang, X., and Schwarz, T.L. (2009). The mechanism of Ca<sup>2+</sup> -dependent regulation of kinesin-  
610 mediated mitochondrial motility. *Cell* *136*, 163-174.  
611 Wang, X., Winter, D., Ashrafi, G., Schlehe, J., Wong, Y.L., Selkoe, D., Rice, S., Steen, J., LaVoie, M.J.,  
612 and Schwarz, T.L. (2011). PINK1 and Parkin target Miro for phosphorylation and degradation to arrest  
613 mitochondrial motility. *Cell* *147*, 893-906.  
614 Wilhelm, L.P., Zapata-Munoz, J., Villarejo-Zori, B., Pellegrin, S., Freire, C.M., Toyne, A.M., Boya, P.,  
615 and Ganley, I.G. (2022). BNIP3L/NIX regulates both mitophagy and pexophagy. *The EMBO journal*,  
616 e111115.  
617 Zerbes, R.M., van der Klei, I.J., Veenhuis, M., Pfanner, N., van der Laan, M., and Bohnert, M. (2012).  
618 Mitofilin complexes: conserved organizers of mitochondrial membrane architecture. *Biological*  
619 *chemistry* *393*, 1247-1261.  
620 Zheng, Q., Chen, Y., Chen, D., Zhao, H., Feng, Y., Meng, Q., Zhao, Y., and Zhang, H. (2022). Calcium  
621 transients on the ER surface trigger liquid-liquid phase separation of FIP200 to specify autophagosome  
622 initiation sites. *Cell*.

623

624

## 625 **Acknowledgements**



626 We thank M.F. Tsai for *MCU* KO cells, L. Pallanck for flies, A. E. Medlock, O. Ross, and S. Han for  
627 discussion, C. Kwak, Z. T. Cook, D. M. Conradson and J. Panji for technical support, the Steinberg lab  
628 for assistance, the Wang lab members for discussion, the Stanford HTBC (RRID: SCR\_017794) and  
629 D. E. Solow-Cordero for assistance with drug screens, and the SBC, the Stanford Alzheimer's Disease  
630 Research Center (ADRC), the Department of Pathology at University of California Los Angeles (UCLA),  
631 R. N. Alcalay, Columbia University, and the Michael J. Fox Foundation (MJFF) for providing human  
632 tissues and cells. This work was supported by NINDS (RO1NS089583, RO1NS128040-01; X.W.),  
633 NIGMS (RO1GM143258; X.W.), NIA (RO1AG060747; M.D.G.), Stanford SPARK and Spectrum  
634 SPADA (X.W.), Sanofi iAward (X.W.), the Warren Alpert Foundation (X.W.), the MJFF (021146; X.W.),  
635 the Harrington Discovery Institute (X.W.), the Belgian American Education Foundation (R.V.), the Glenn  
636 Foundation Postdoctoral Fellowship (L.L.), and the European Union's Horizon 2020 research and  
637 innovation program under the Marie Skłodowska-Curie (890650; Y.LG.).

638

### 639 **Author contributions**

640 R.V. did drug screens. S.E.R. and R.B.A. performed pathway analysis. V.B., A.S.D., C.-H.H., L.L., and  
641 S.C. performed human cell experiments. L.L. conducted fly work. C.M.M. and L.F. did in vitro work.  
642 Y.LG. and M.D.G. analyzed human genetic data. P.N. analyzed PBMC data. X.W. conceived and  
643 supervised the project. All authors designed the experiments and wrote the paper.

644

### 645 **Competing interests**

646 The authors declare the following competing interests: X.W. is a co-founder, adviser, and shareholder of  
647 AcureX Therapeutics, and a shareholder of Mitokinin Inc. V.B., L.L., C.-H.H., and R.V. are shareholders  
648 of AcureX Therapeutics. P.N. is employed by Vroom Inc. Patents based on this study were filed by

649 Stanford University with X.W., R.V., V.B., L.L., C.-H.H. as inventors. The remaining authors declare no  
650 competing interests.

651

## 652 **Data availability**

653 Further information and reagents are available from the corresponding author.

654

## 655 **FIGURE LEGENDS**

656 **Figure 1. HTP Screens Identify Ca<sup>2+</sup>-Related Drug Hits for PD.** (A) Schematic representation of a  
657 custom-designed drug screen for Miro1 in PD fibroblasts. (B) Pathway analysis identified calcium as a  
658 shared factor in the primary hit-Miro1 network. Each individual pathway is generated using a primary hit  
659 and Miro1 as search query and the resulting subnetwork is visualized and curated using docs2graph—a  
660 knowledge-graph browser. The visualization shows a subgraph generated by docs2graph from the  
661 collection of curated supporting documents for each pathway.

662

663 **Figure 2. Benidipine Rescues PD Relevant Phenotypes.** (A-B) iPSC-derived neurons from a PD patient  
664 with *SNCA-A53T* and the isogenic control, treated as indicated, were immunostained with anti-TH (A) or  
665 TUNEL and Dapi (B), and imaged under a confocal microscope. Scale bars: 100  $\mu$ m. Below:  
666 Quantifications of the density of TH-positive neurons (A) or the percentage of TUNEL-positive neurons  
667 (B). n=20 images from 3 independent coverslips. P values are compared with the far-left bar, except  
668 indicated otherwise. (C) 40-day-old fly brains were immunostained with anti-TH and the DA neuron  
669 number was counted in the PPL1 cluster. Scale bar: 20  $\mu$ m. n=4, 7, 7, 4 (from left to right). (D) The  
670 Performance Index was measured in 30-day-old flies, fed as indicated. n=59, 57, 54, 57 flies (from left to

671 right), 3 independent experiments. (C-D) Drug treatment was started from adulthood (day 1). One-Way  
672 Anova Post Hoc Tukey Test for all panels.

673

674 **Figure 3. The EF-hands of Miro Play a Role in Causing PD Relevant Phenotypes.** (A) Representative  
675 still images from live Mito-dsRed and GFP-Miro1 imaging movies of axons of indicated genotypes,  
676 following 100  $\mu$ M Antimycin A treatment. Scale bar: 10  $\mu$ m. (B) Left: Quantification of the GFP-Miro1  
677 intensity at 25 minutes divided by that at 0 minute following 100  $\mu$ M Antimycin A treatment from the  
678 same axonal region. Right: Quantification of the reduction speed of the GFP-Miro1 intensity within 25  
679 minutes following 100  $\mu$ M Antimycin A treatment. (C) Left: Quantification of the Mito-dsRed intensity  
680 at 58 minutes divided by that at 0 minute following 100  $\mu$ M Antimycin A treatment from the same axonal  
681 region. Right: Quantification of the Mito-dsRed intensity reduction speed within 58 minutes following  
682 100  $\mu$ M Antimycin A treatment. (B-C) n=5, 4, 5 (from left to right) axons (one axon per coverslip). (D)  
683 The DA neuron number was counted in the PPL1 cluster of flies with indicated genotypes. Scale bar: 20  
684  $\mu$ m. n=7, 4, 6, 5 (from left to right). (E) The Performance Index was measured in flies with indicated  
685 genotypes and age. n (from left to right)=49, 47, 40, 47 flies (day 12); 49, 47, 39, 47 (day 14); 48, 45, 37,  
686 44 (day 20); 3 independent experiments. One-Way Anova Post Hoc Tukey Test for all panels.

687

688 **Figure 4. PD Mitochondria Import More Ca<sup>2+</sup>.** iPSC-derived neurons from a PD patient with *SNCA-*  
689 *A53T* and the isogenic control were stimulated with thrombin and mitochondrial (Rhod-2) and cytosolic  
690 Ca<sup>2+</sup> levels (Calcium Green) were measured. Left: Representative traces of Ca<sup>2+</sup> ions in neurons. Right:  
691 Quantifications of the peak fluorescent intensity normalized to baseline. n=15 cell bodies from 3  
692 independent coverslips. Two-tailed Welch's T Test.

693

694 **Figure 5. Iron Promotes MCU Oligomerization.** (A) Elution profiles of MCU from SEC samples. (B)  
695 HEK cells were treated similarly as above, run in Native-PAGE, and blotted. Right: Qualifications of the  
696 band intensities normalized to the total protein amount measured by BCA. n=5 independent experiments.  
697 One-Way Anova Post Hoc Tukey Test. (C) Elution profiles of additional proteins from SEC samples.

698

699 **Figure 6. MCU Binds to Fe<sup>2+</sup>.** (A) HEK cells were treated with or without 5 mM Fe<sup>2+</sup> for 21 hours, then  
700 IPed with rabbit IgG or anti-MCU, and Fe<sup>2+</sup> concentrations in the IP samples were detected. n=4  
701 independent experiments. Top western blots demonstrated the success of IP. Anti-MCU was validated  
702 using *MCU*<sup>-/-</sup> HEK cell lysate (bottom panel). Arrow indicates the MCU band. (B) HEK cells were treated  
703 with 5 mM Fe<sup>2+</sup> or Co<sup>2+</sup> for 22 hours and lysed in buffer containing the same metal. Lysates were run in  
704 Native- or SDS-PAGE and blotted with anti-MCU. Similar results were seen for at least 3 times. (C) HEK  
705 cells treated with 5 mM Fe<sup>2+</sup> or 500 μM Co<sup>2+</sup> for 22 hours were stimulated with thrombin and  
706 mitochondrial Ca<sup>2+</sup> levels (Rhod-2) were measured. The peak fluorescent intensity normalized to baseline  
707 is quantified. n=20 cells from 4 independent coverslips. (D-E) Fluorescence-detection SEC profiles of  
708 purified human MCU. The annotation of the peaks is based on (Fan et al., 2018; Fan et al., 2020). (F)  
709 *MCU*<sup>-/-</sup> HEK cells transfected as indicated were treated with 5 mM Fe<sup>2+</sup> for 20 hours, then IPed with anti-  
710 Flag, and Fe<sup>2+</sup> concentrations in the IP samples were detected. Two-tailed paired T Test. (G) Left:  
711 Representative blots of IP with anti-Flag using cell lysates as indicated, run in Native- or SDS-PAGE.  
712 Right: Quantification of the band intensity of MCU-Flag in Native-PAGE normalized to that in SDS-  
713 PAGE from the same experiment. n=4 independent experiments. (H) HEK cells treated as indicated were  
714 stimulated with thrombin and mitochondrial Ca<sup>2+</sup> levels (Rhod-2) were measured. Representative traces  
715 of Ca<sup>2+</sup> ions. (I-J) Based on traces like in (H), the peak fluorescent intensity normalized to baseline (I) or

716 efflux rate (J) is quantified. n=17 cells from 4 independent coverslips. Two-tailed Welch's T Test for all  
717 panels except (F).

718

719 **Figure 7. Chelating Iron Restores Ca<sup>2+</sup> and neuronal homeostasis in PD neurons.** (A) Similar to  
720 Figure 4, iPSC-derived neurons from a PD patient with *SNCA-A53T* and the isogenic control, with or  
721 without treatment of 100 μM DFP for 24 hours, were stimulated with thrombin, and mitochondrial Ca<sup>2+</sup>  
722 (Rhod-2) was measured. Quantifications of the peak fluorescent intensity normalized to baseline. n=15  
723 cell bodies from 3 independent coverslips. Control data without DFP treatment are the same as in Figure  
724 4. One-Way Anova Post Hoc Tukey Test. (B) iPSC-derived neurons treated as indicated, were  
725 immunostained with TUNEL and Dapi, and imaged under a confocal microscope. Scale bar: 50 μm.  
726 Below: Quantification of the percentage of TUNEL-positive neurons. n=20 images from 3 independent  
727 coverslips. P values are compared within each genotype (significant compared to every other condition)  
728 with One-Way Anova Post Hoc Tukey Test. (C) The DA neuron number was counted in the PPL1 cluster  
729 of flies with indicated genotypes and conditions. Drug treatment was started from adulthood (day 1). Scale  
730 bar: 20 μm. n=6, 9, 8, 7 (from left to right). (D) The Performance Index was measured in flies. Drug  
731 treatment was started from embryogenesis. n=35, 33, 40, 34 flies (from left to right), 3 independent  
732 experiments. (C-D) One-Way Anova Post Hoc Tukey Test. (E) Postmortem brains were run in Native- or  
733 SDS-PAGE and blotted. The band intensity normalized to the total protein level measured by BCA is  
734 divided by that of the universal control on the same blot: CVD (cardiovascular disease), which was  
735 included on every blot. The MCU oligomer bands in Native-PAGE and the NCLX and MCUB bands in  
736 SDS-PAGE (average of 3 replicates) are used in the plot. HC: healthy control. (F) Miro1 protein levels  
737 were measured using ELISA in PBMCs treated with DMSO or 40 μM CCCP for 6 hours. Miro1 Ratio is  
738 calculated by dividing the Miro1 value treated with CCCP by that with DMSO from the same subject. Dot

739 plot with Mean±S.E.M. n=80 healthy controls and 107 PD. Two-tailed Welch's T Test. (G) PBMCs from  
740 4 PD patients were treated with 40 μM CCCP for 6 hours, or pretreated with 10 μM Benidipine or MR3  
741 for 18 hours and then with 40 μM CCCP for another 6 hours, and Miro1 protein was detected using ELISA.  
742 Patient IDs are the same as in Table S4. Two-tailed paired T Test. (H) Schematic representation of the  
743 iron-calcium-Miro axis discovered in this study. Red texts show genes containing variants associated with  
744 PD status.

745

746
